# Supplementary material
Source: publisher figshare collection journal article supplement (https://acs.figshare.com/ndownloader/files/5109625)

Stannous chloride in alcohol:  
a one pot conversion of 2-nitro-*N*-arylbenzamides to 2,3-dihydro-1*H*-  
quinazoline-4-ones

*Choong Leol Yoo and Mark J. Kurth\**

*Department of Chemistry  
University of California  
One Shields Avenue  
Davis, California 95616-5295*

**Table of Contents**

|                                                     |         |
|-----------------------------------------------------|---------|
| <sup>1</sup> H and <sup>13</sup> C NMR of <b>5a</b> | S2-S3   |
| <sup>1</sup> H and <sup>13</sup> C NMR of <b>5b</b> | S4-S5   |
| <sup>1</sup> H and <sup>13</sup> C NMR of <b>5d</b> | S6-S7   |
| <sup>1</sup> H and <sup>13</sup> C NMR of <b>6a</b> | S8-S9   |
| <sup>1</sup> H and <sup>13</sup> C NMR of <b>6b</b> | S10-S11 |
| <sup>1</sup> H and <sup>13</sup> C NMR of <b>6d</b> | S12-S13 |
| <sup>1</sup> H and <sup>13</sup> C NMR of <b>6e</b> | S14-S15 |
| <sup>1</sup> H and <sup>13</sup> C NMR of <b>6f</b> | S16-S17 |
| <sup>1</sup> H and <sup>13</sup> C NMR of <b>6g</b> | S18-S19 |
| X-ray crystallographic data of <b>6b</b>            | S20-S34 |
| X-ray crystallographic data of <b>6f</b>            | S35-S46 |

STANDARD 1H OBSERVE

Pulse Sequence: s2pu1

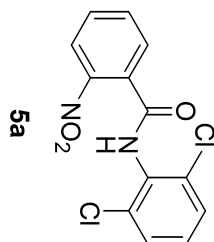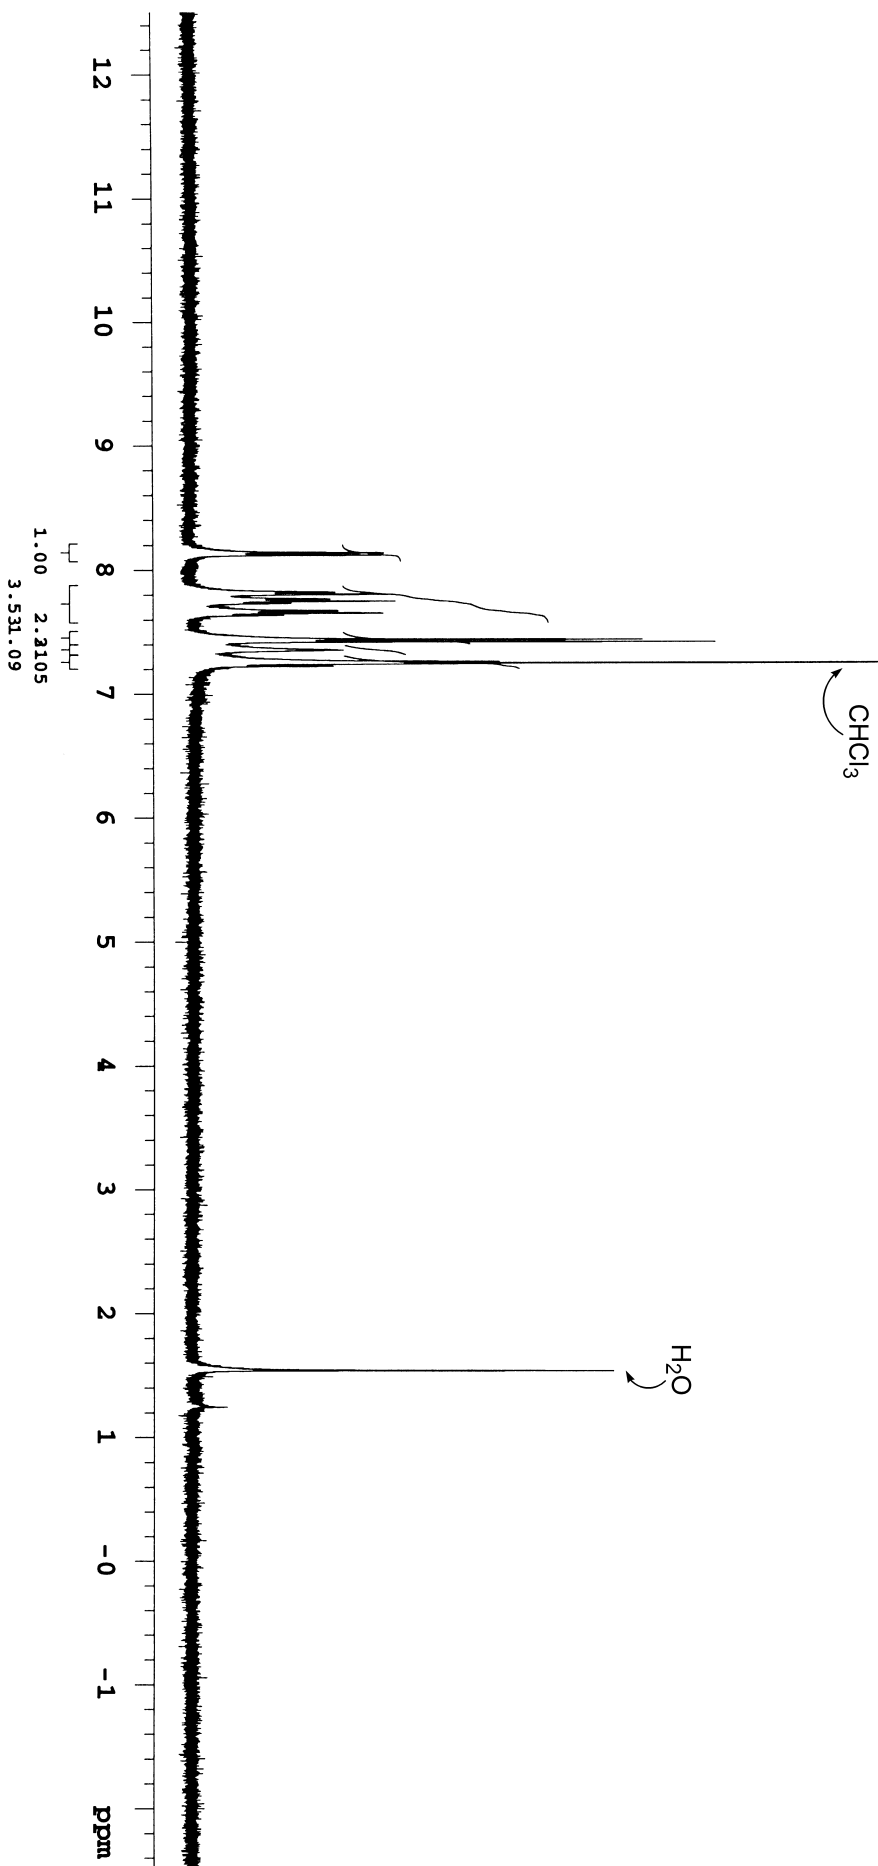

13C OBSERVE

Pulse Sequence: s2pul

Solvent: DMSO

Ambient temperature

INOVA-400 "nmr400"

Relax. delay 0.800 sec

Pulse 46.9 degrees

Acq. time 1.199 sec

Width 25000.0 Hz

304 repetitions

OBSERVE C13, 100.5220913 MHz

DECOUPLE H1, 399.7714777 MHz

Power 36 dB

continuously on

WALTZ-16 modulated

DATA PROCESSING

Line broadening 1.0 Hz

FT size 65536

Total time 33 min, 32 sec

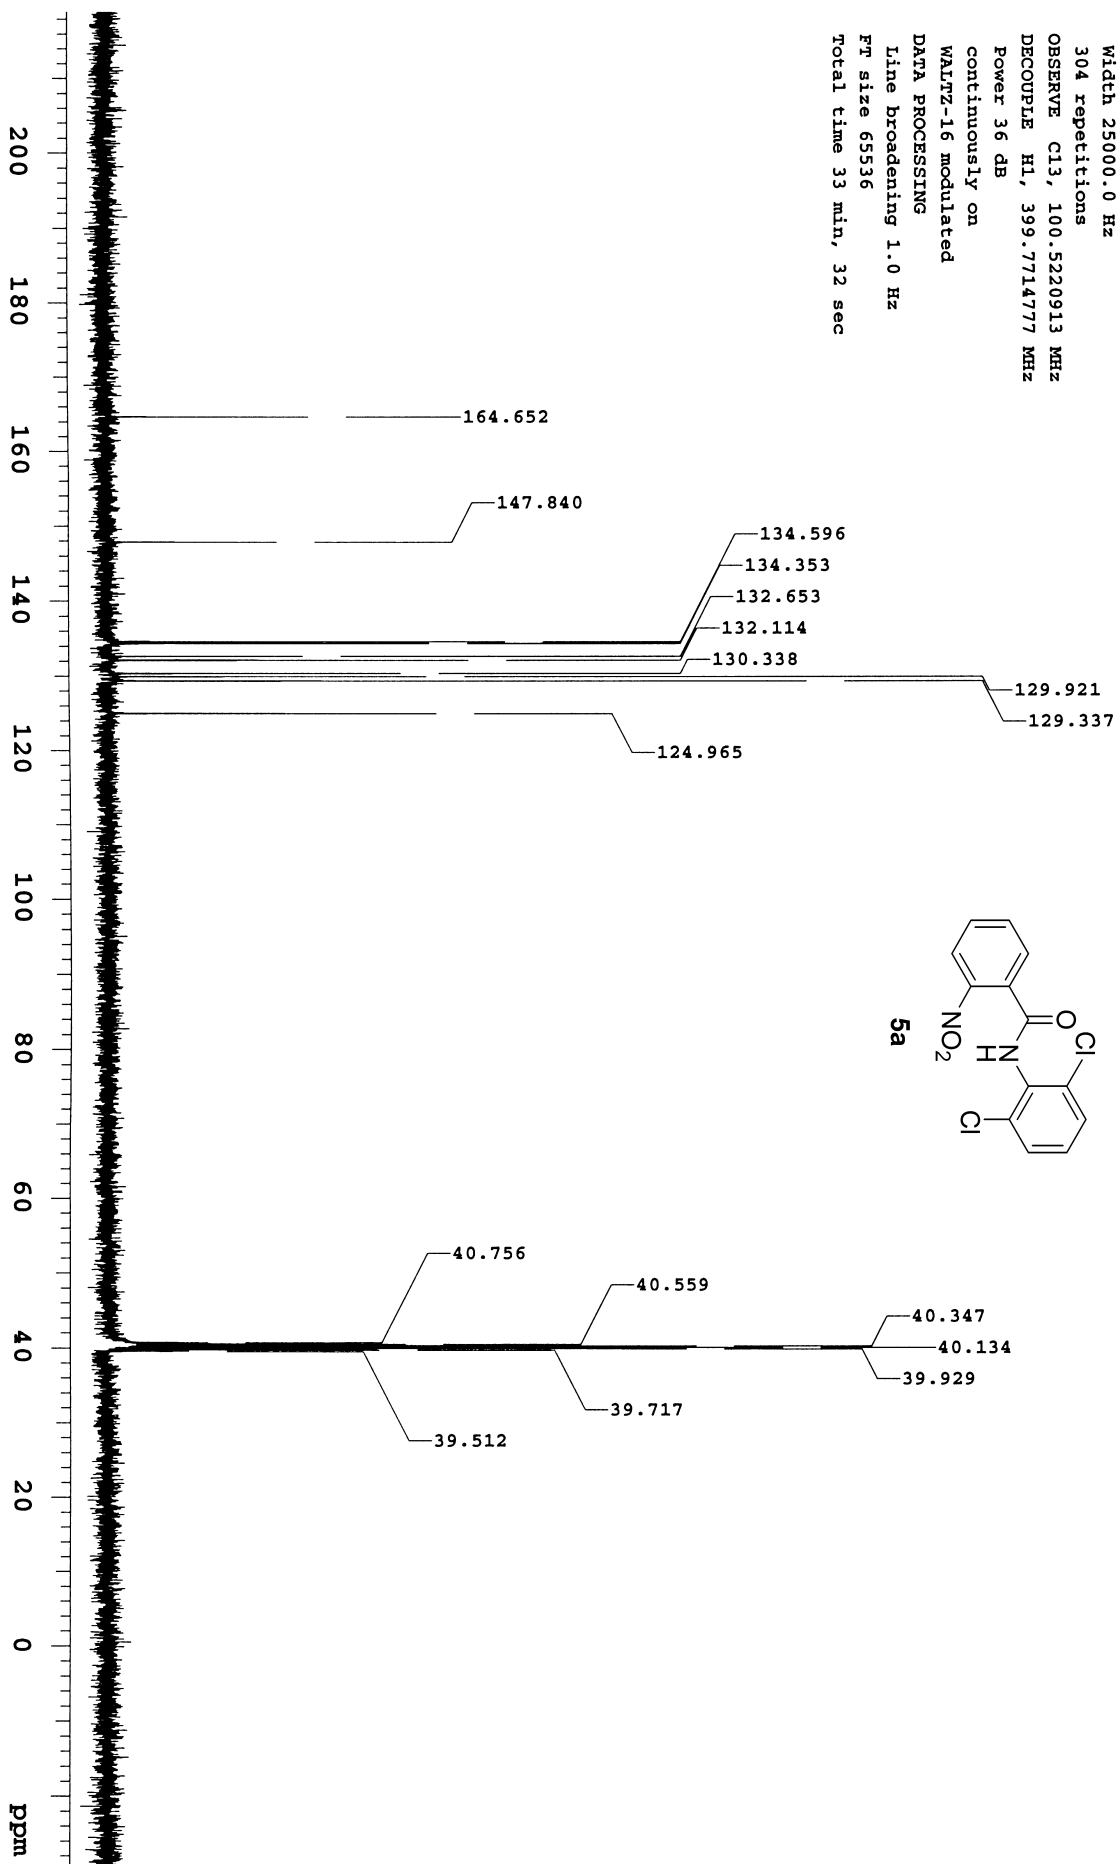

Pulse Sequence: s2pul

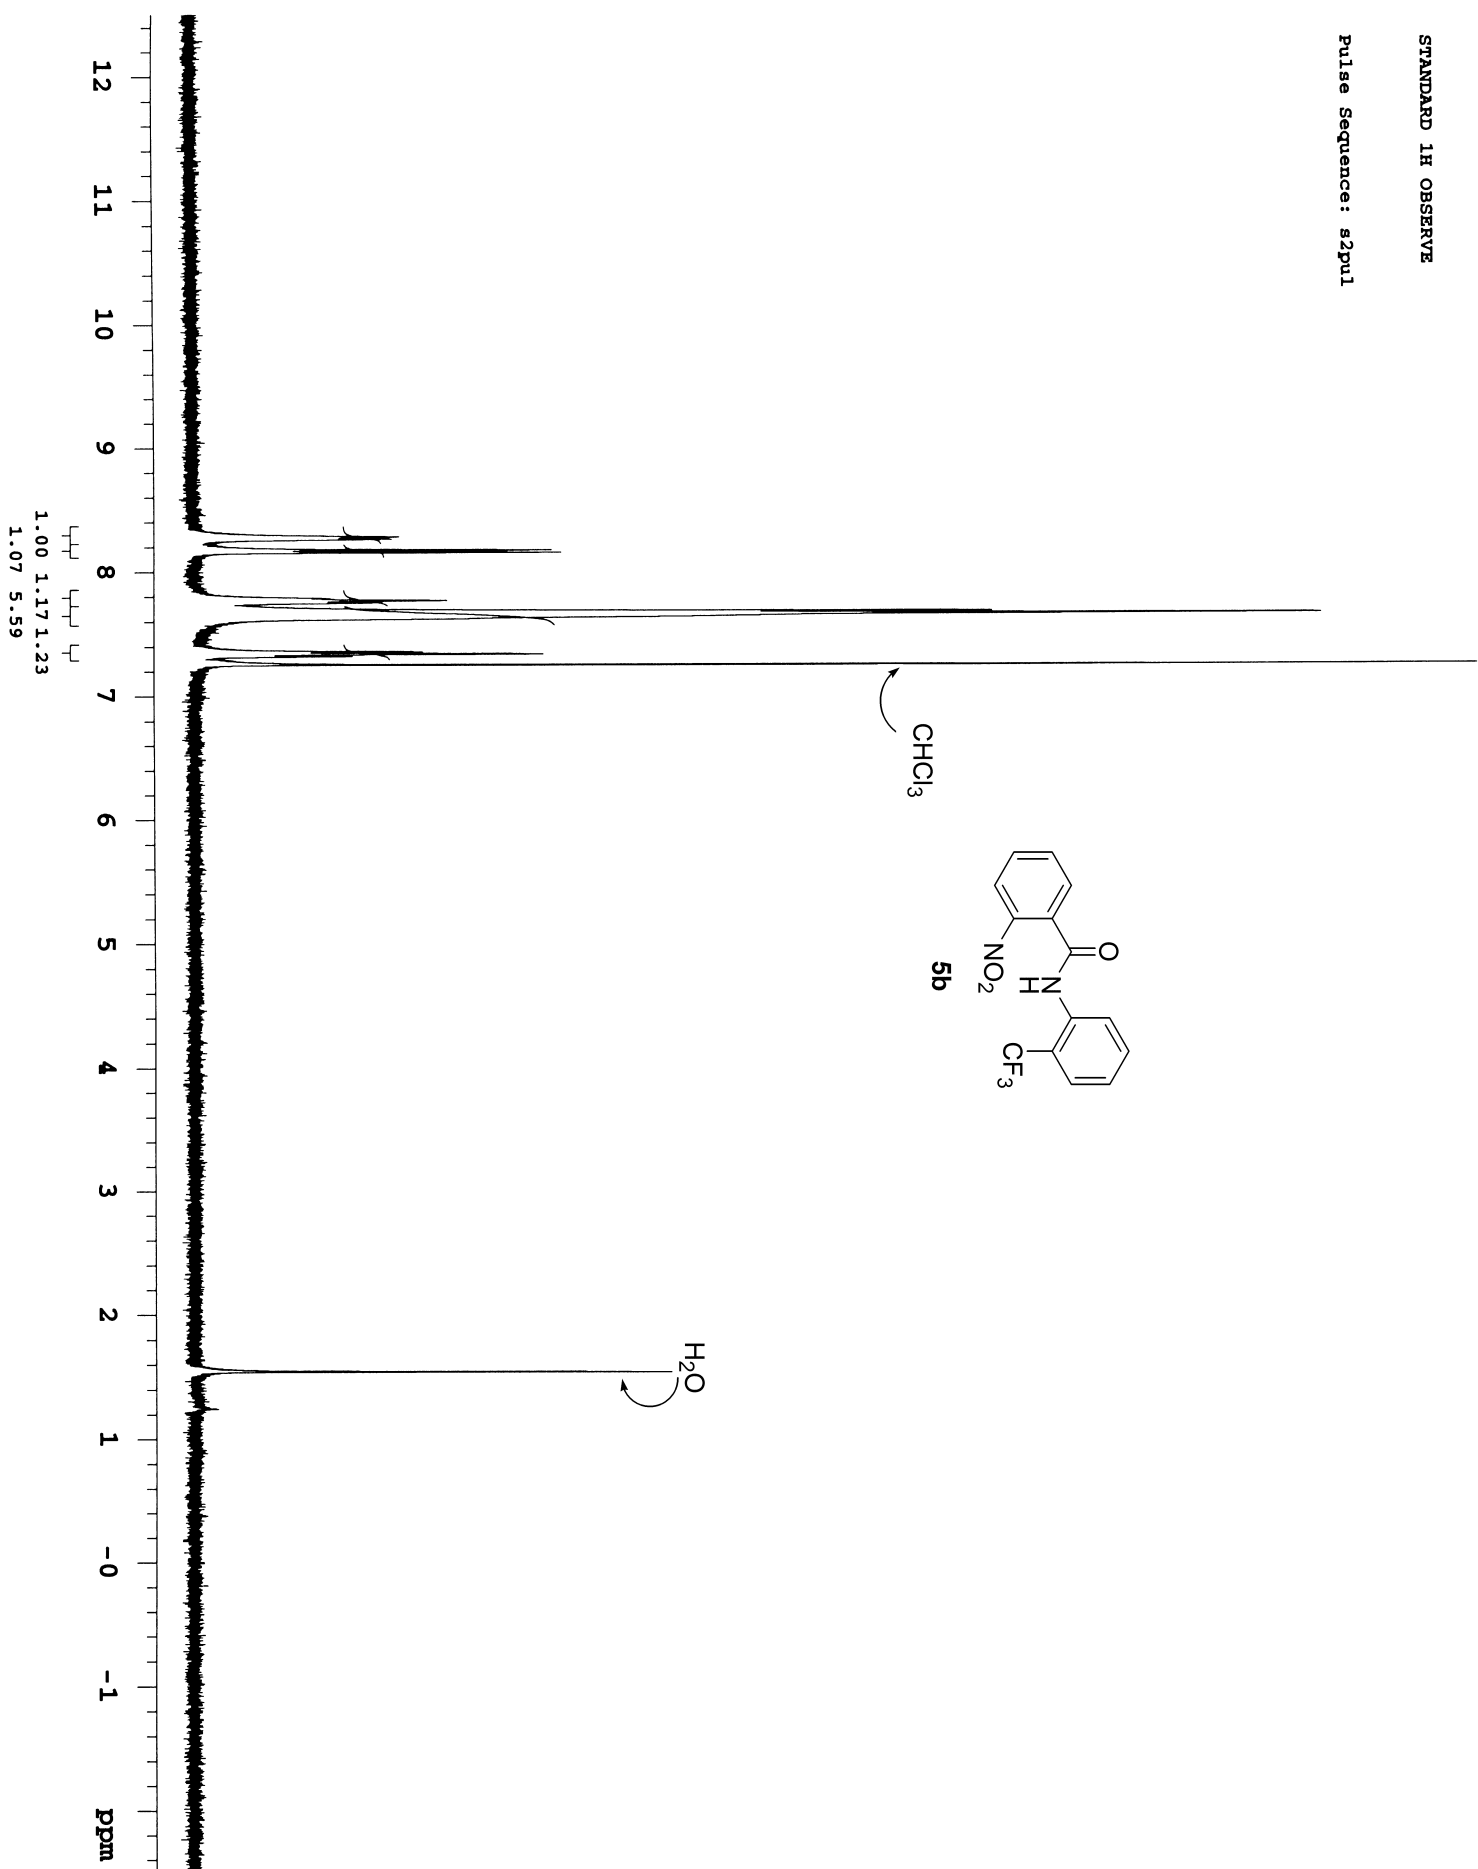

**<sup>13</sup>C OBSERVE**

Pulse Sequence: s2pul

Solvent: DMSO

Ambient temperature

INOVA-400 "nmr400"

Relax. delay 0.800 sec

Pulse 46.9 degrees

Acq. time 1.199 sec

Width 25000.0 Hz

384 repetitions

OBSERVE C13, 100.5220913 MHz

DECOUPLE H1, 399.7714777 MHz

Power 36 dB

continuously on

WALTZ-16 modulated

DATA PROCESSING

Line broadening 1.0 Hz

FT size 65536

Total time 33 min, 32 sec

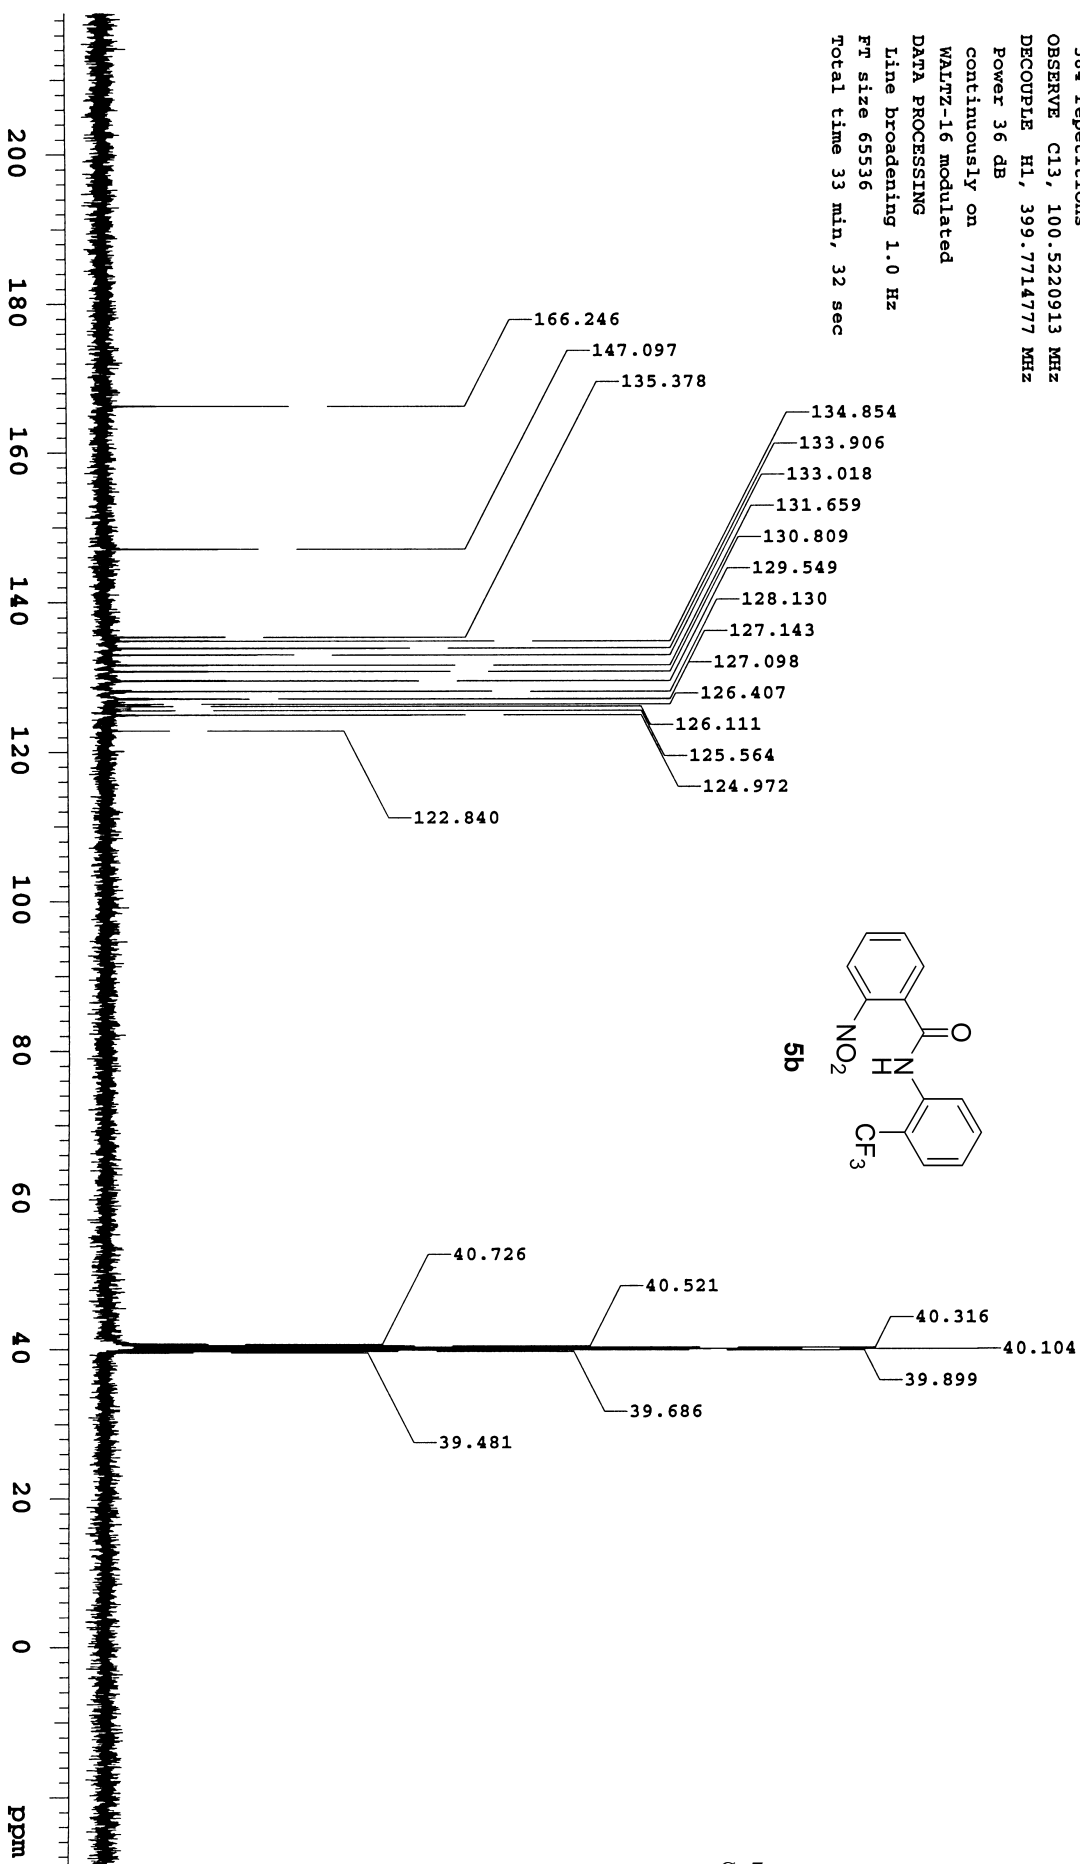

STANDARD 1H OBSERVE

Pulse Sequence: s2pu1

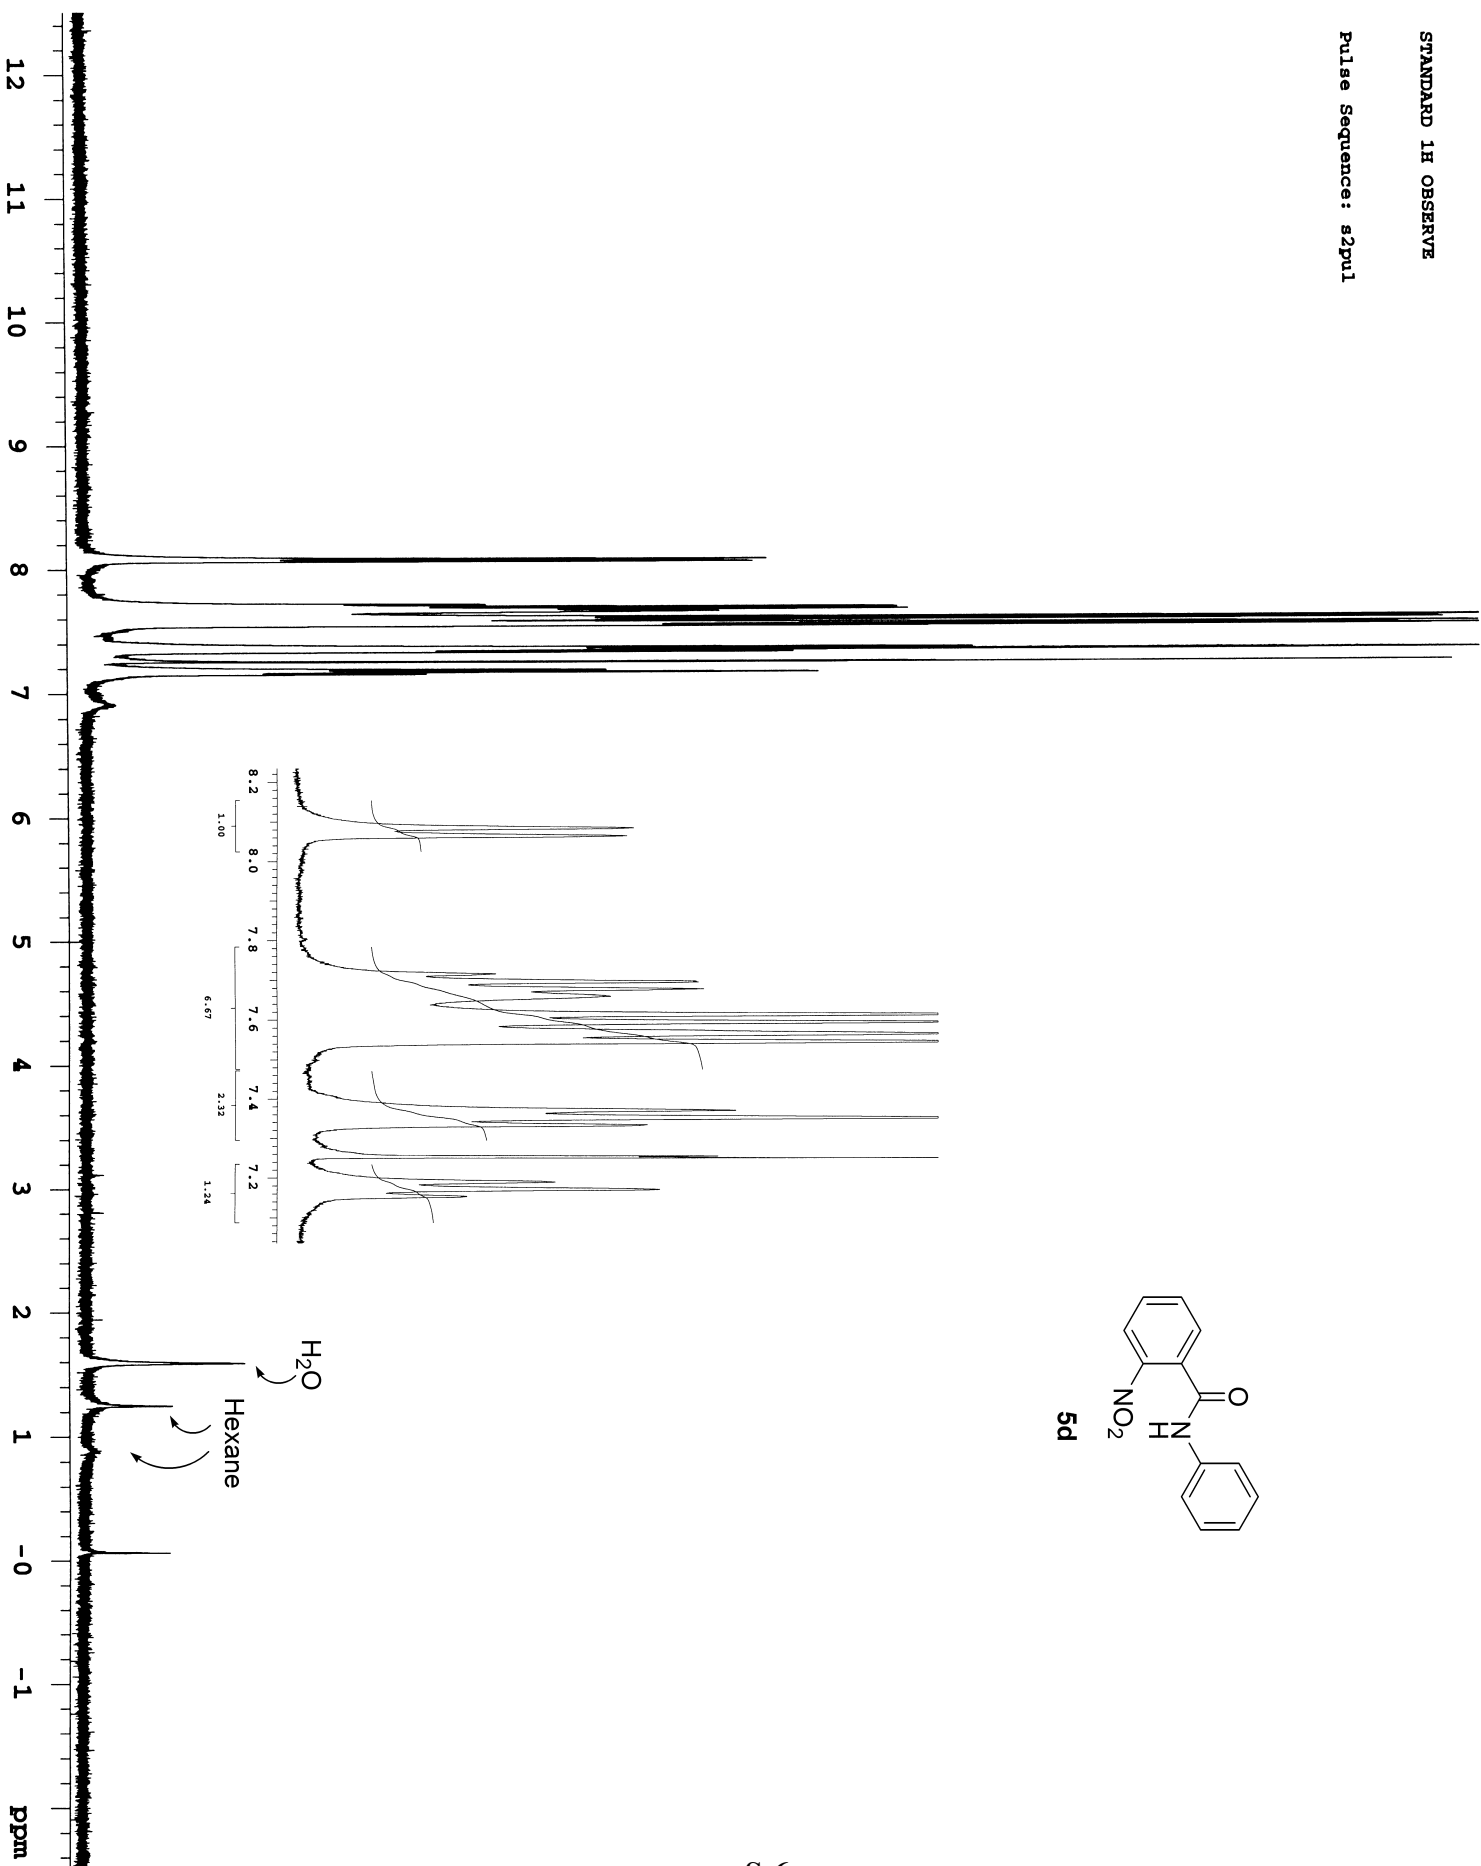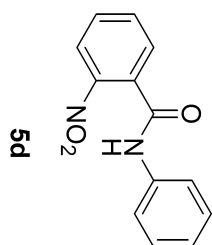

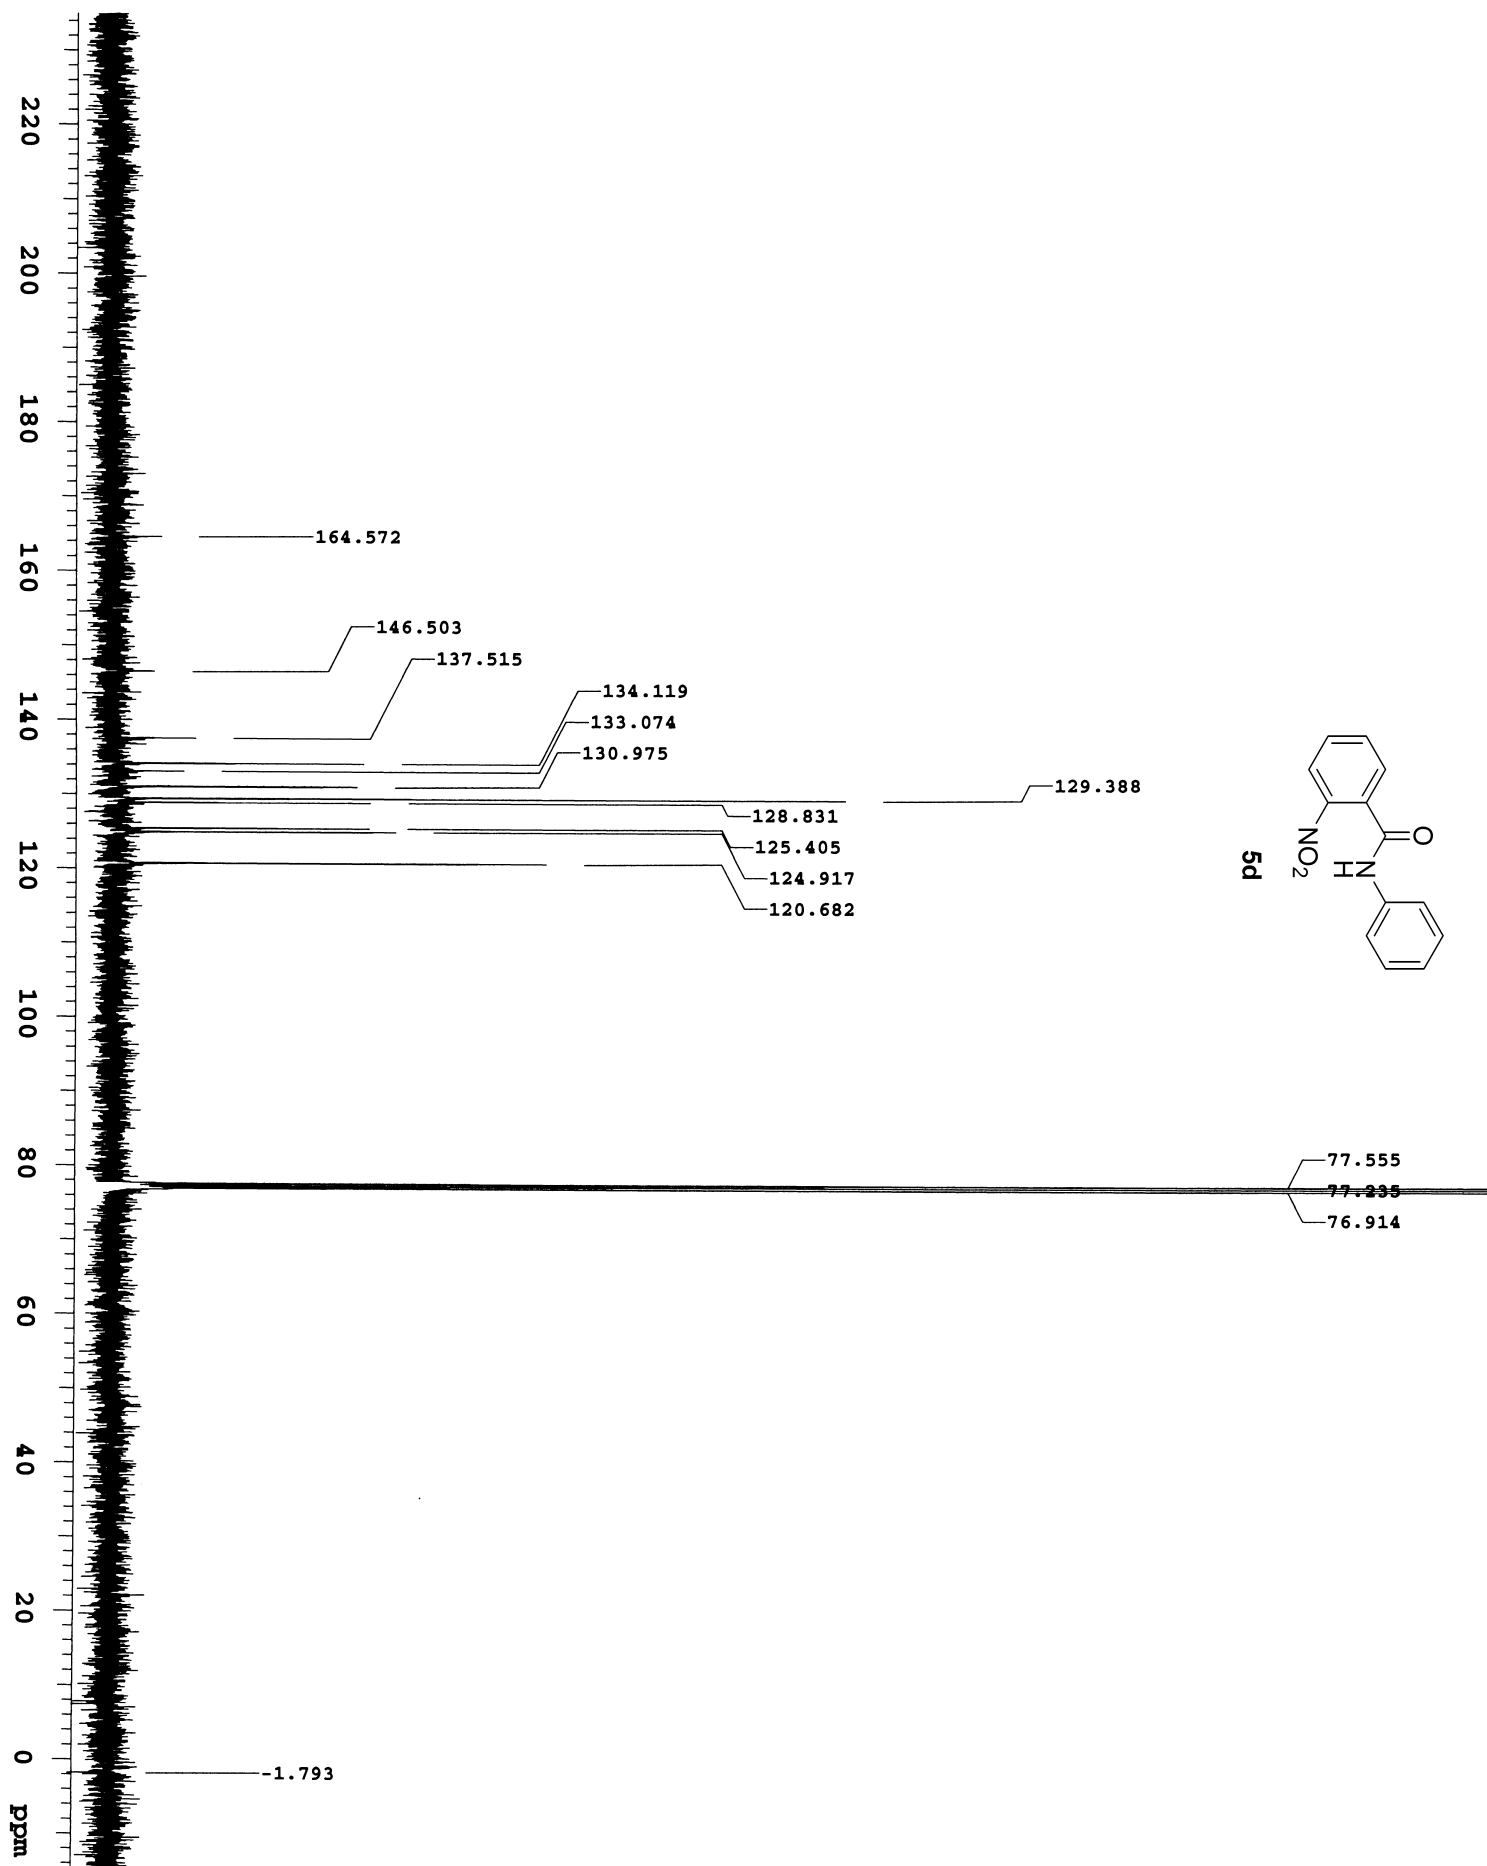

STANDARD 1H OBSERVE

Pulse Sequence: s2pul

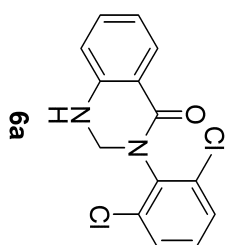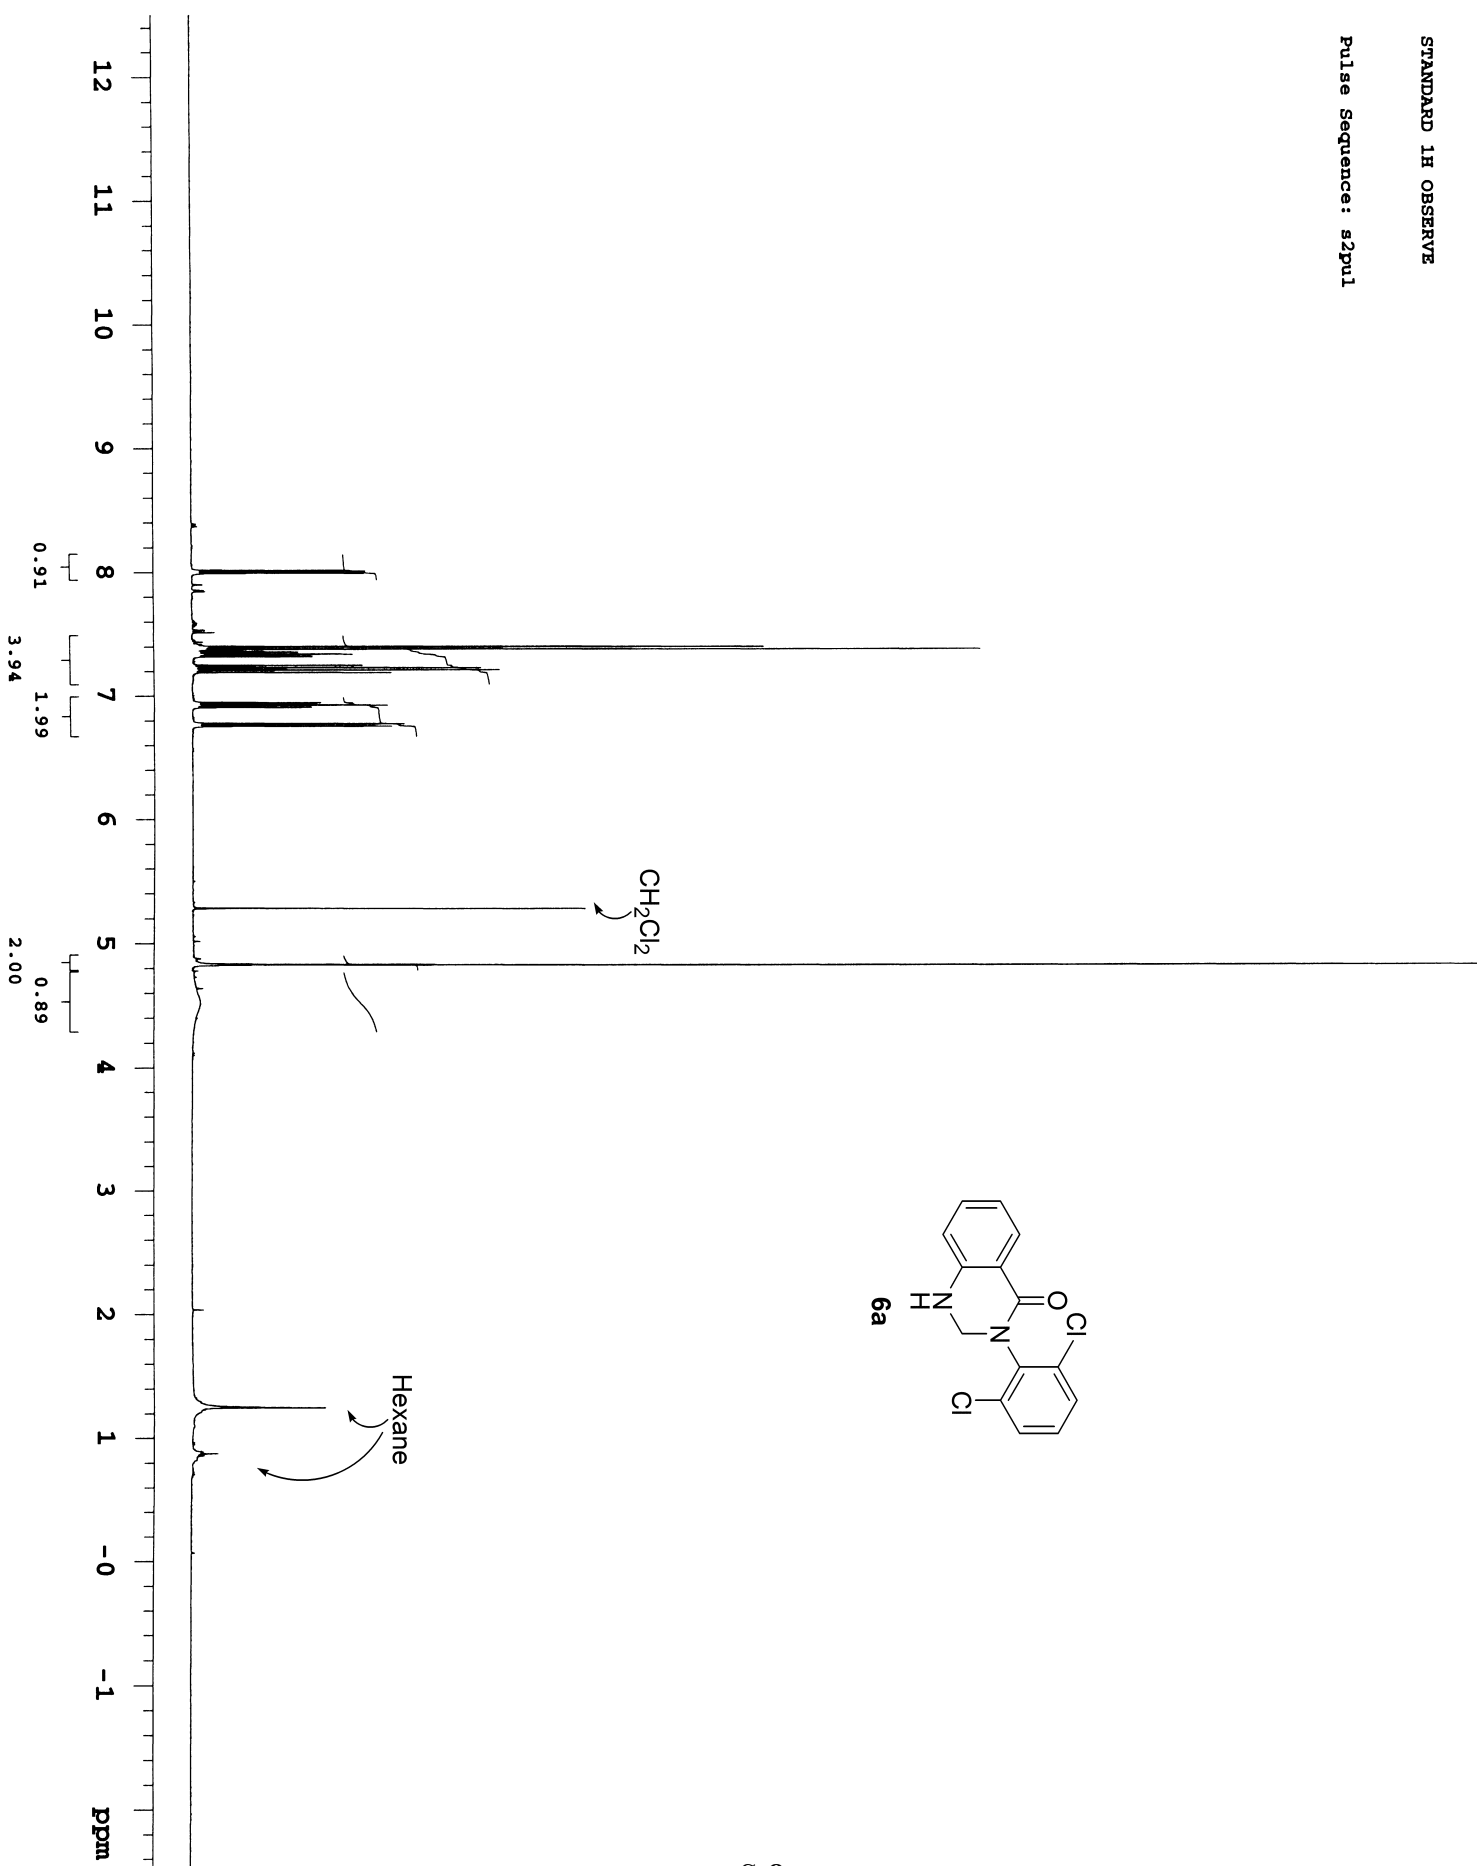



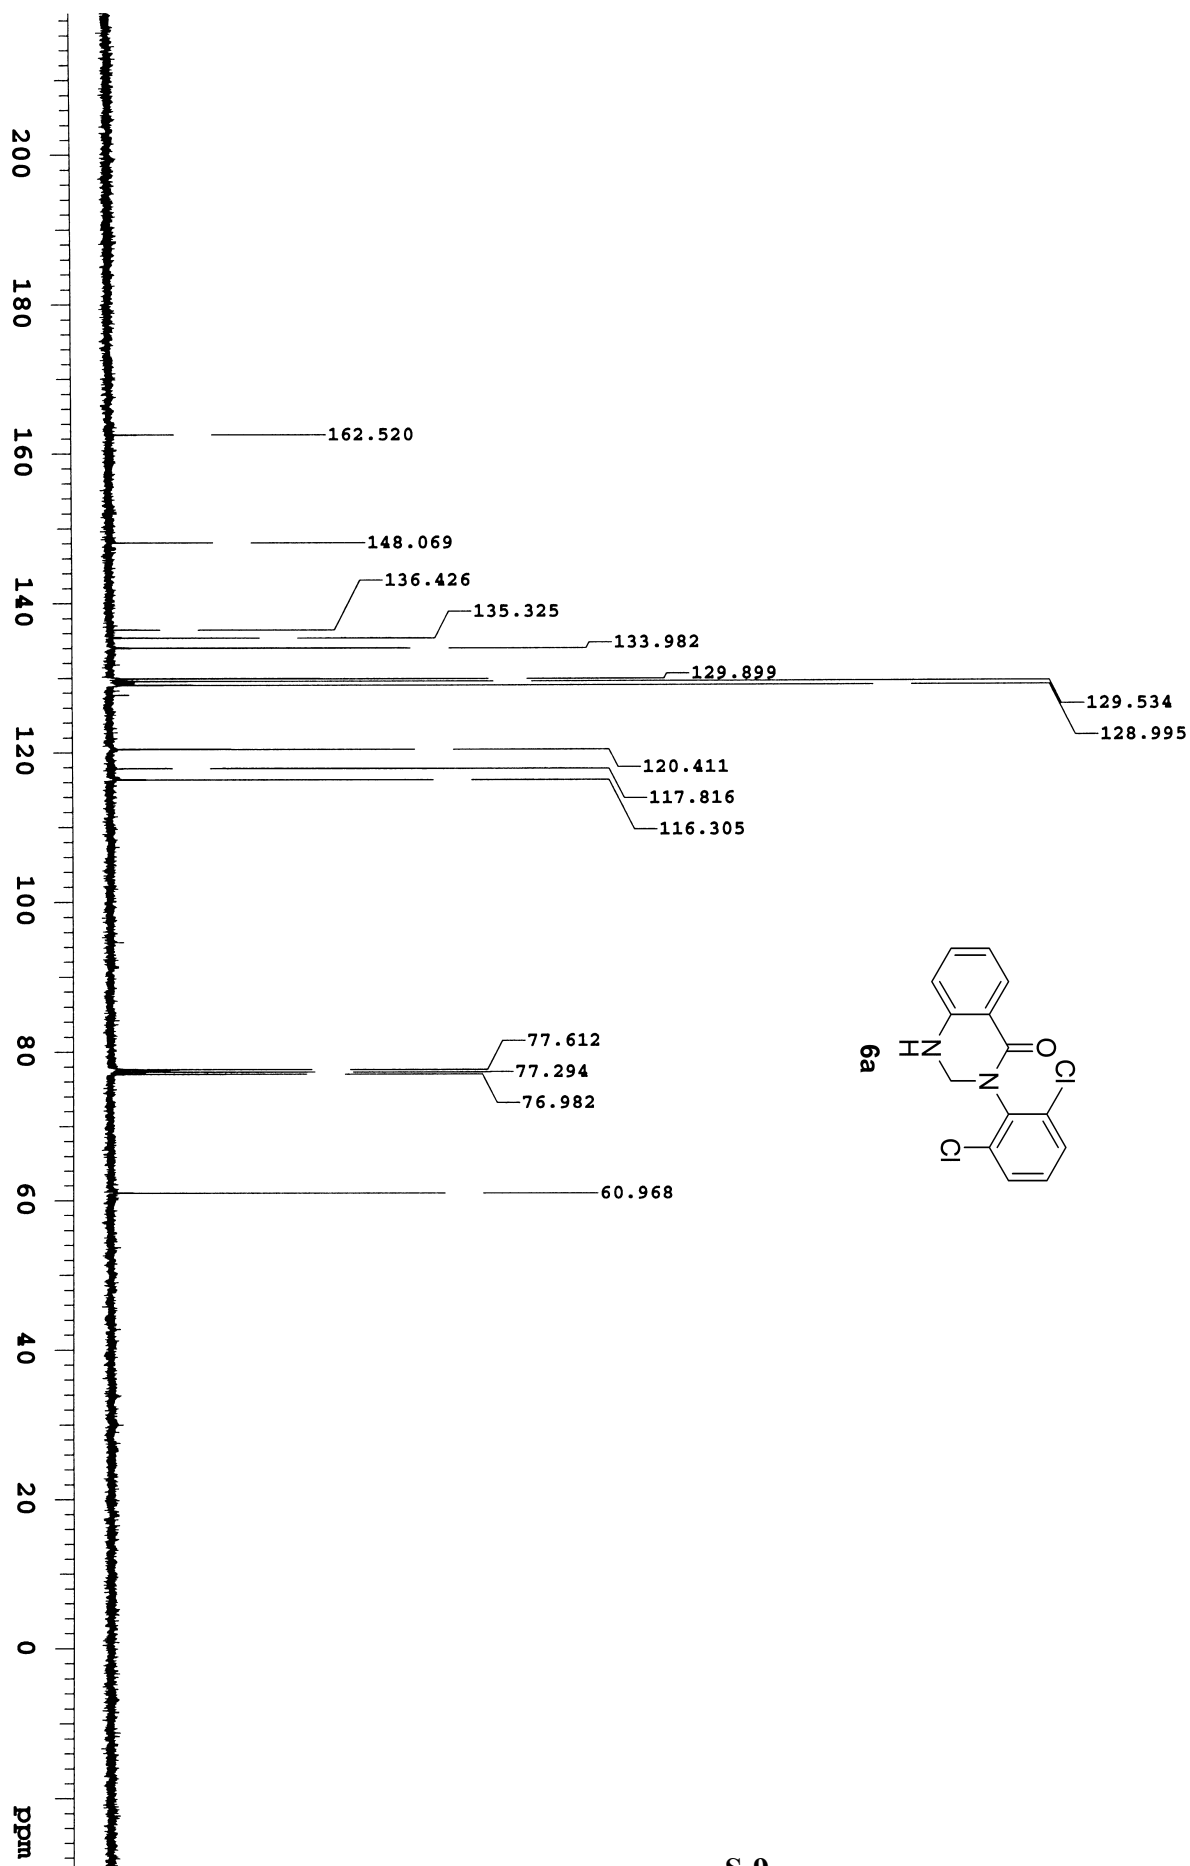

STANDARD 1H OBSERVE

Pulse Sequence: s2pu1

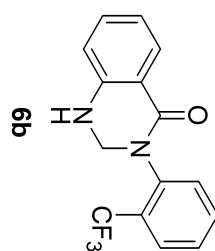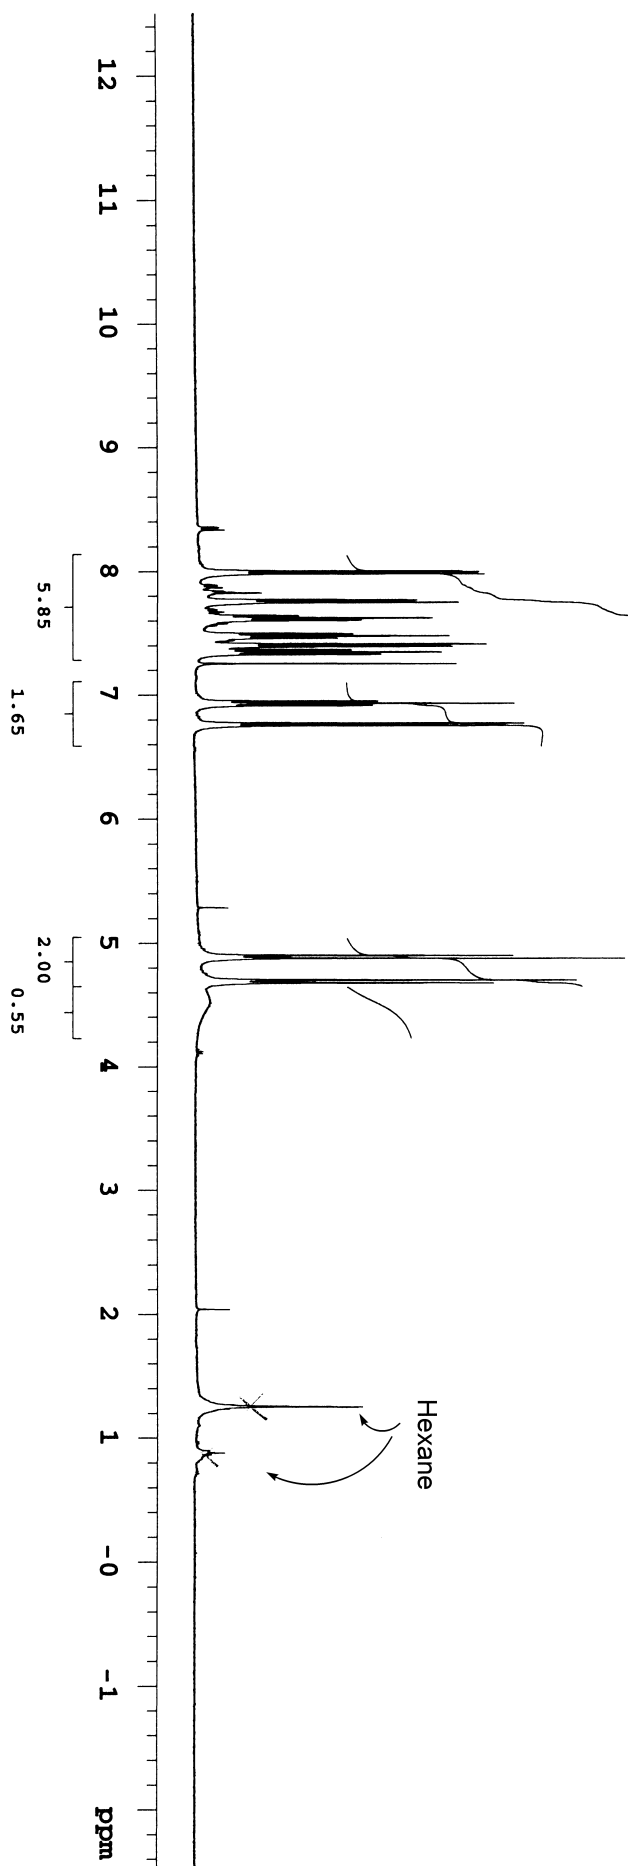

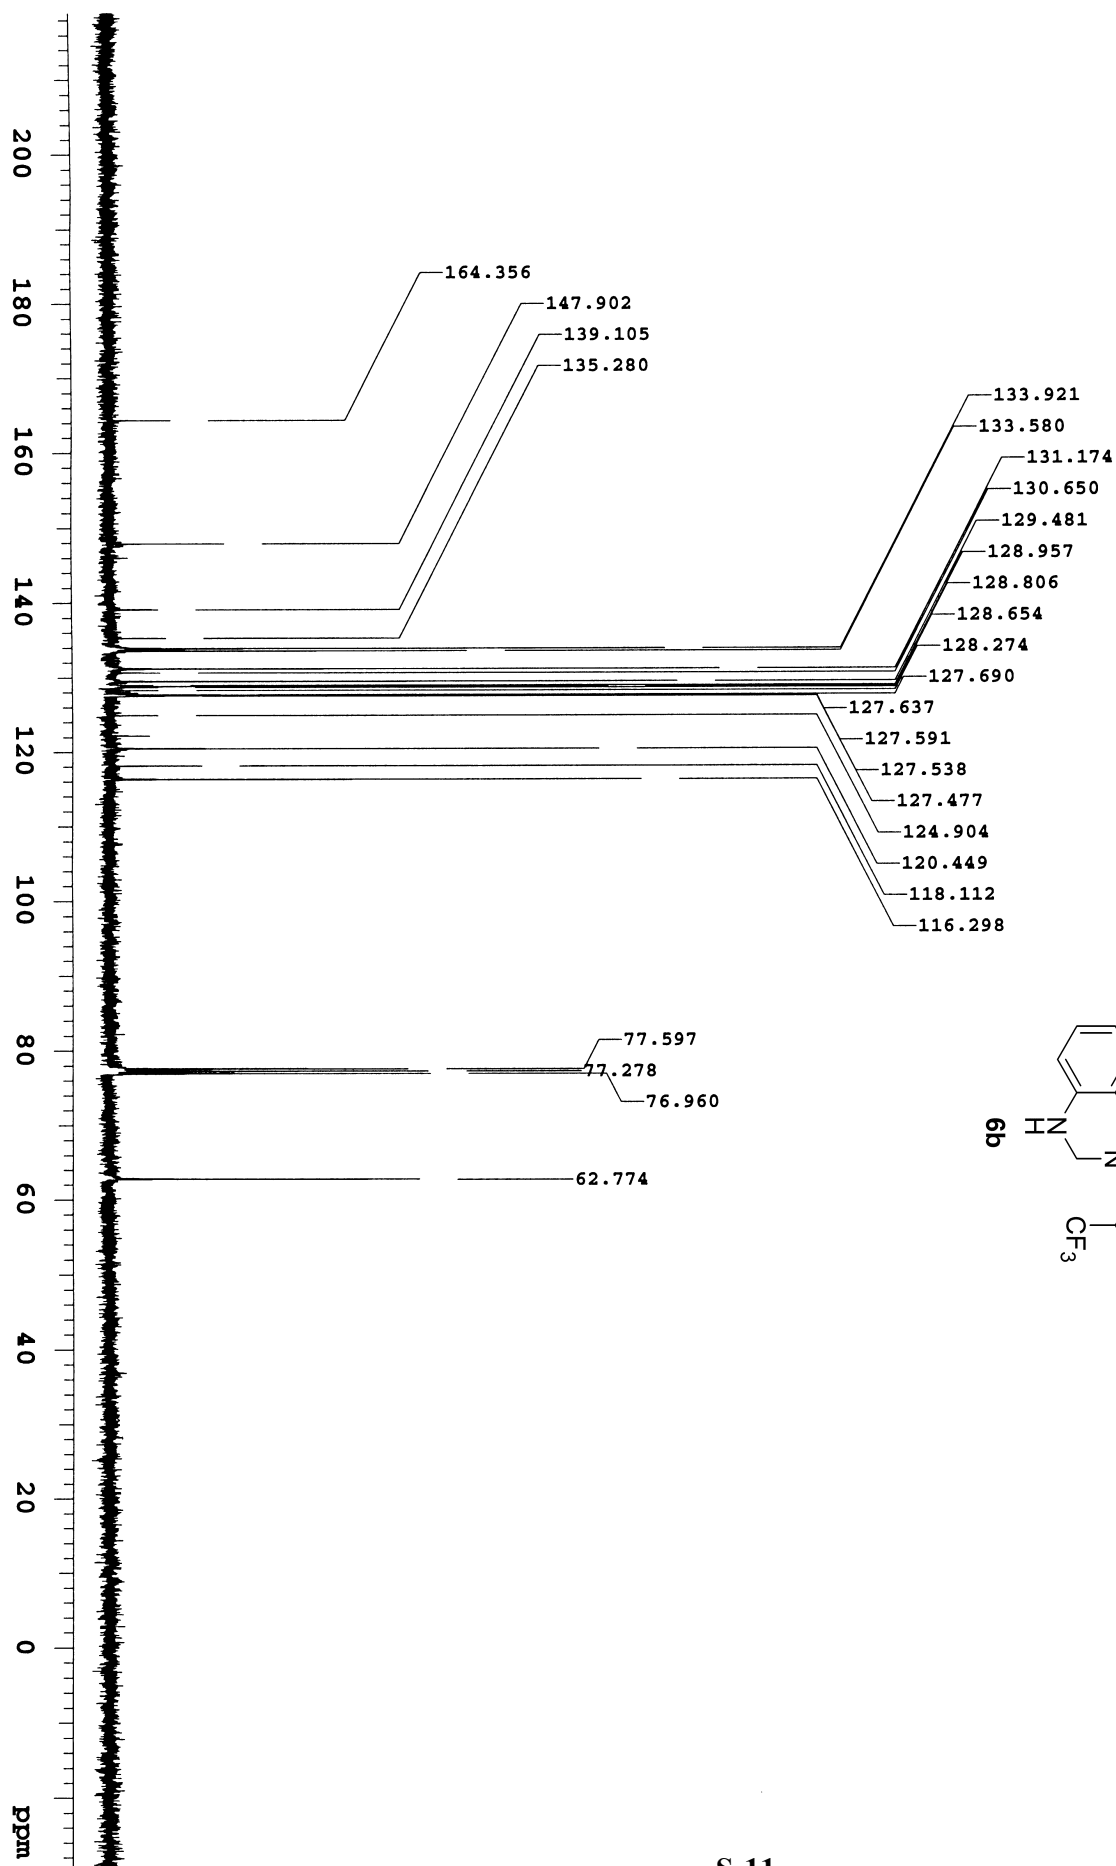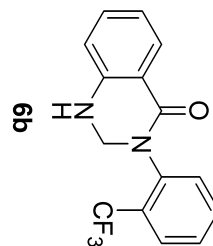

STANDARD 1H OBSERVE

Pulse Sequence: s2pul

Solvent: CDCl3

Ambient temperature

Mercury-300 "nmrdata"

Relax. delay 1.000 sec

Pulse 60.0 degrees

Acq. time 1.998 sec

Width 4506.5 Hz

8 repetitions

OBSERVE H1, 300.0771388 MHz

DATA PROCESSING

FT size 32768

Total time 0 min, 0 sec

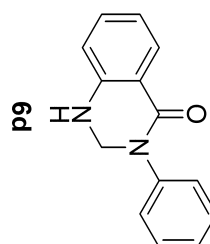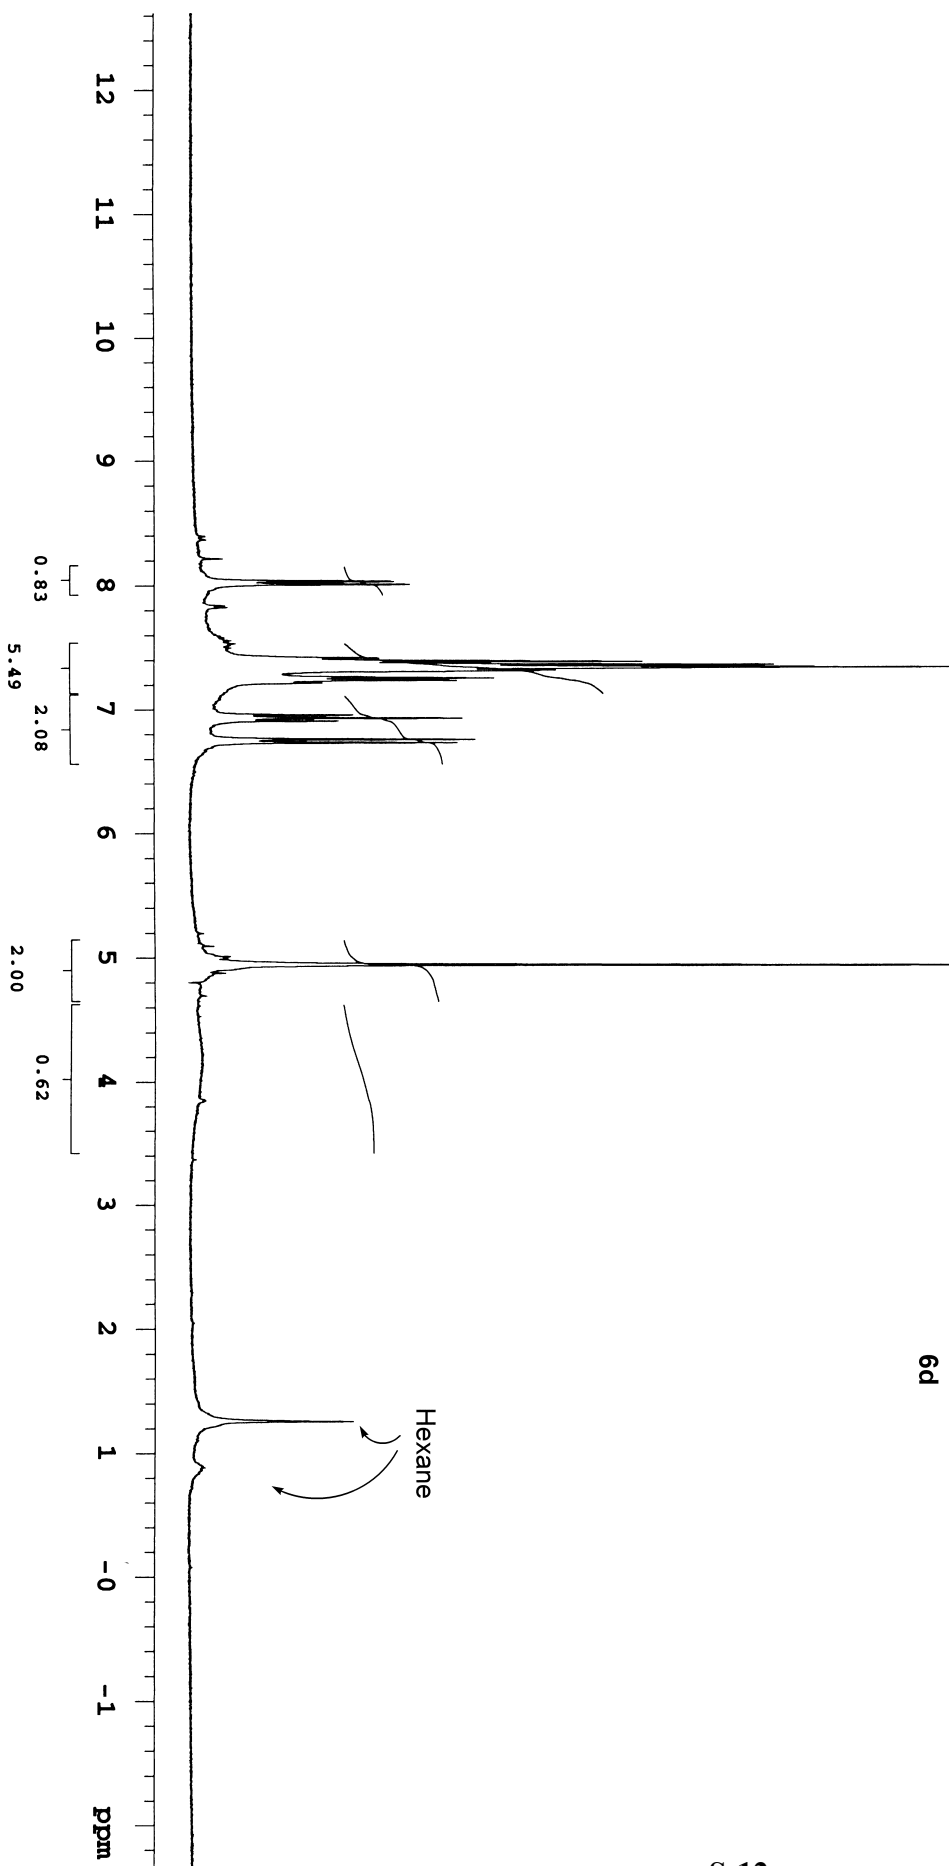

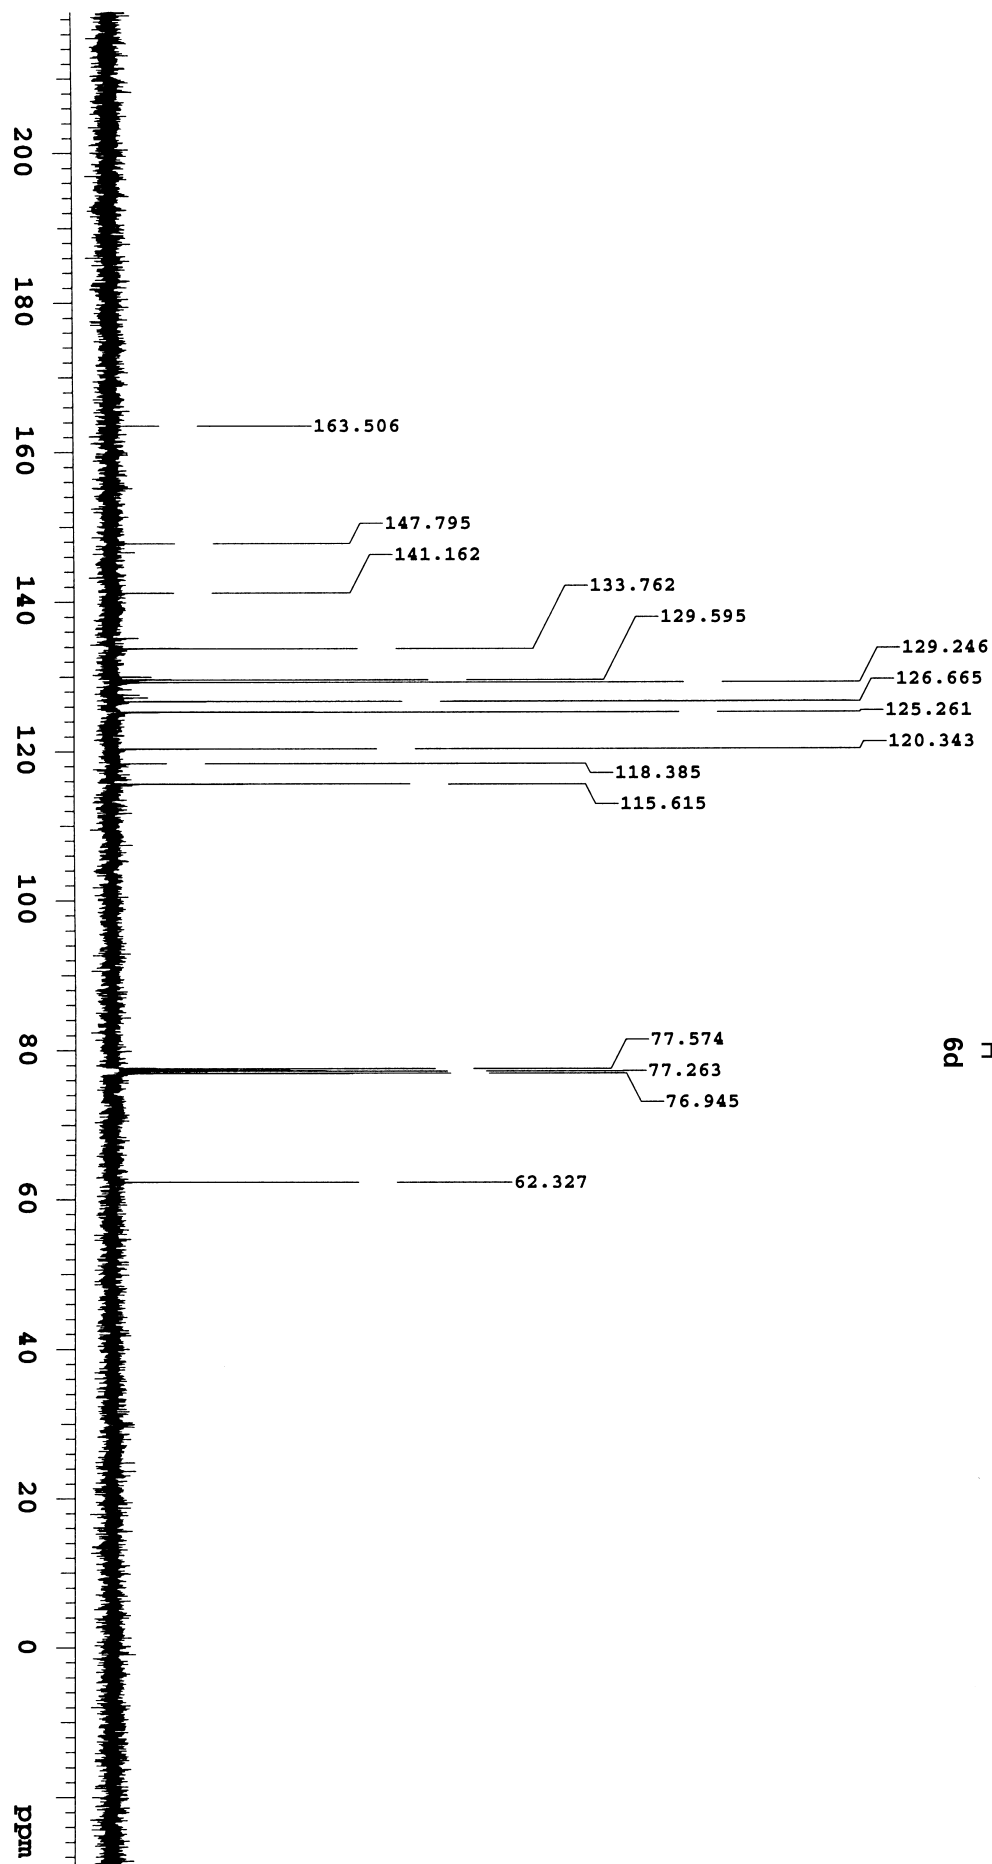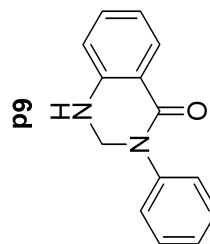

STANDARD 1H OBSERVE

Pulse Sequence: s2pul

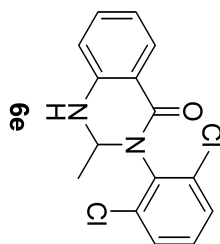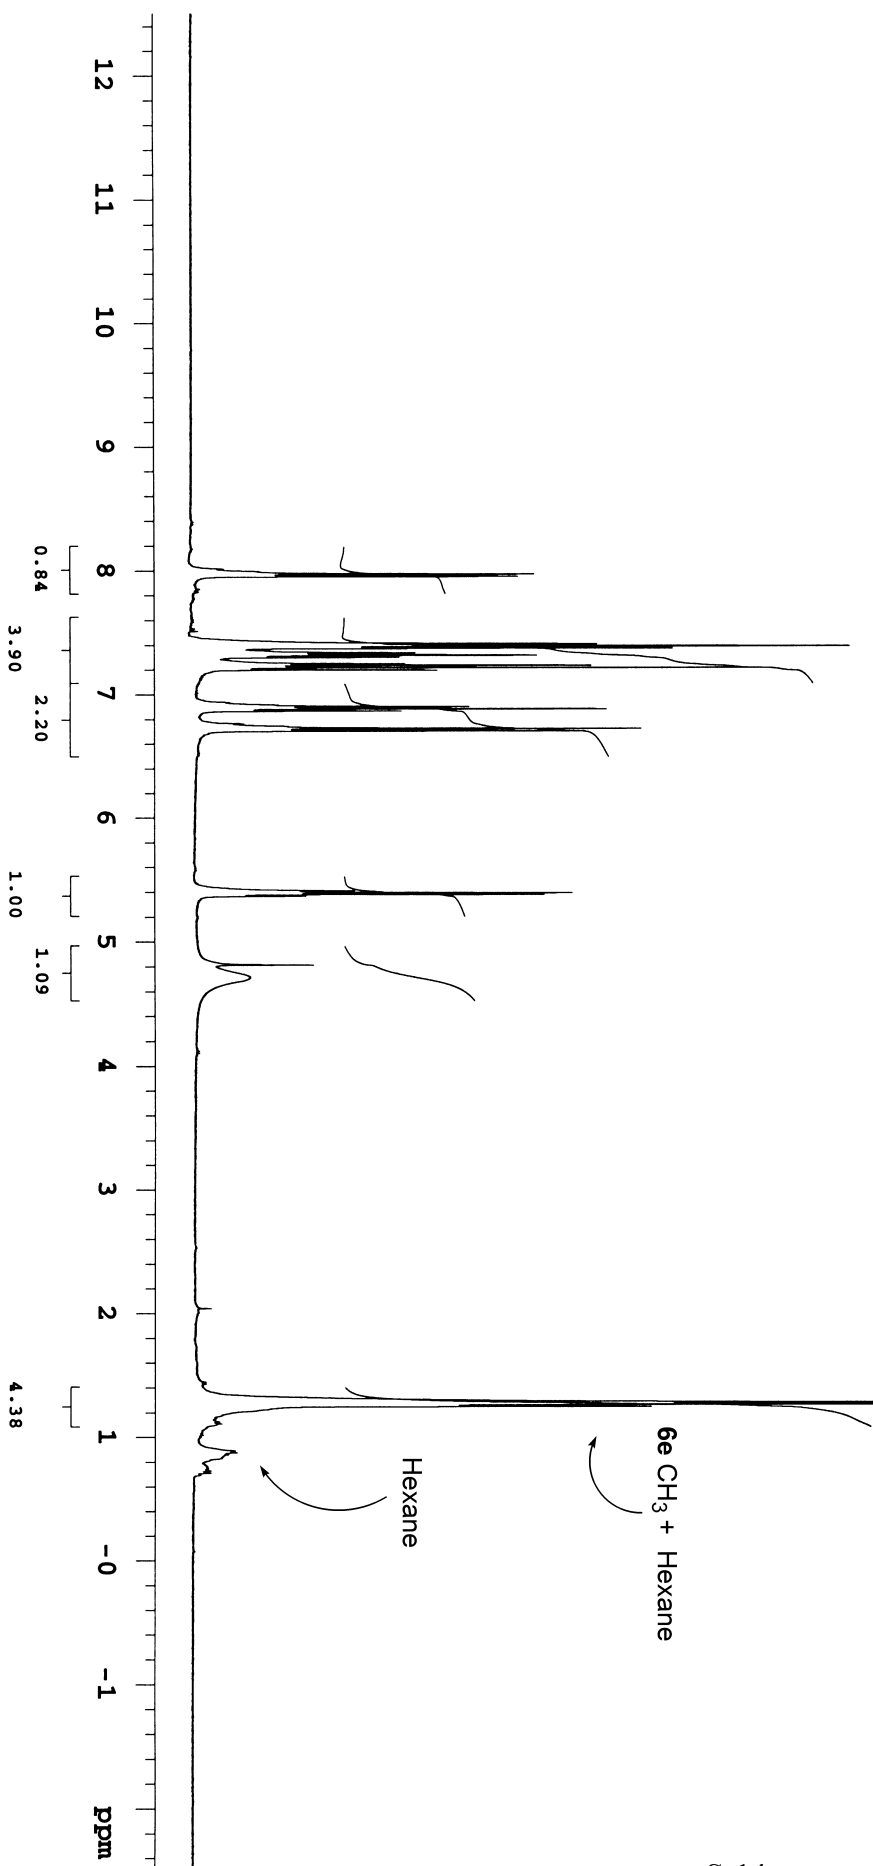

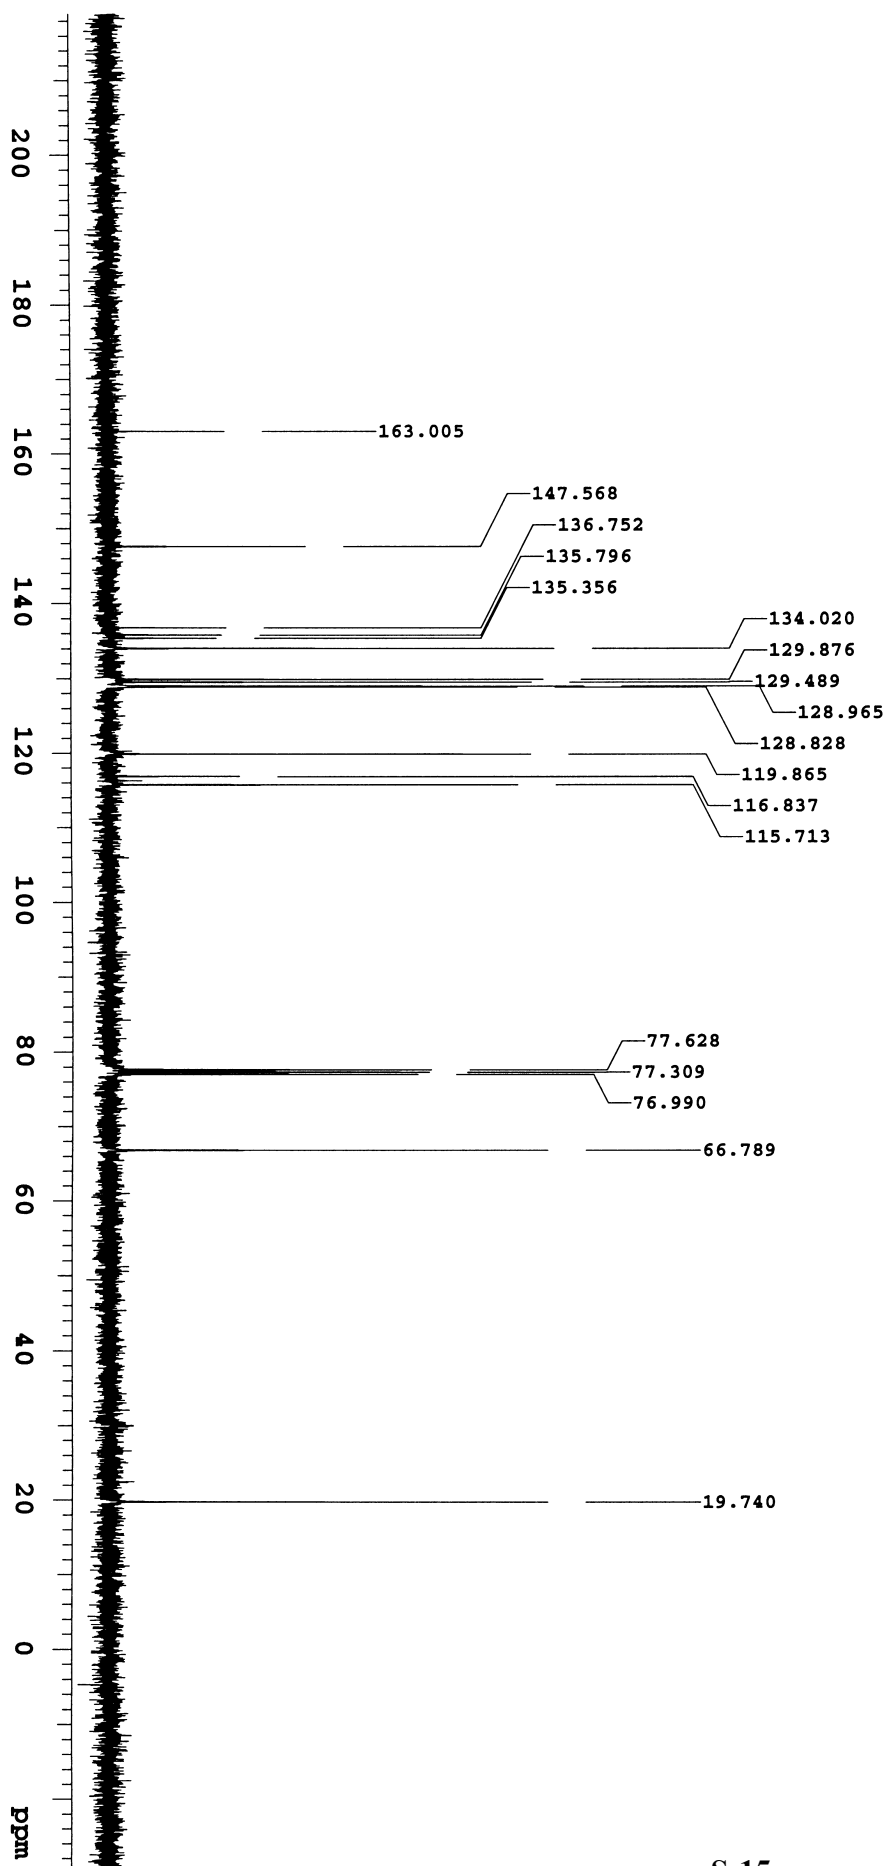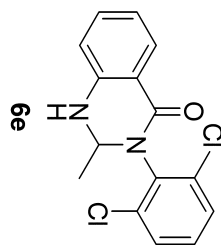

STANDARD 1H OBSERVE

Pulse Sequence: s2pul

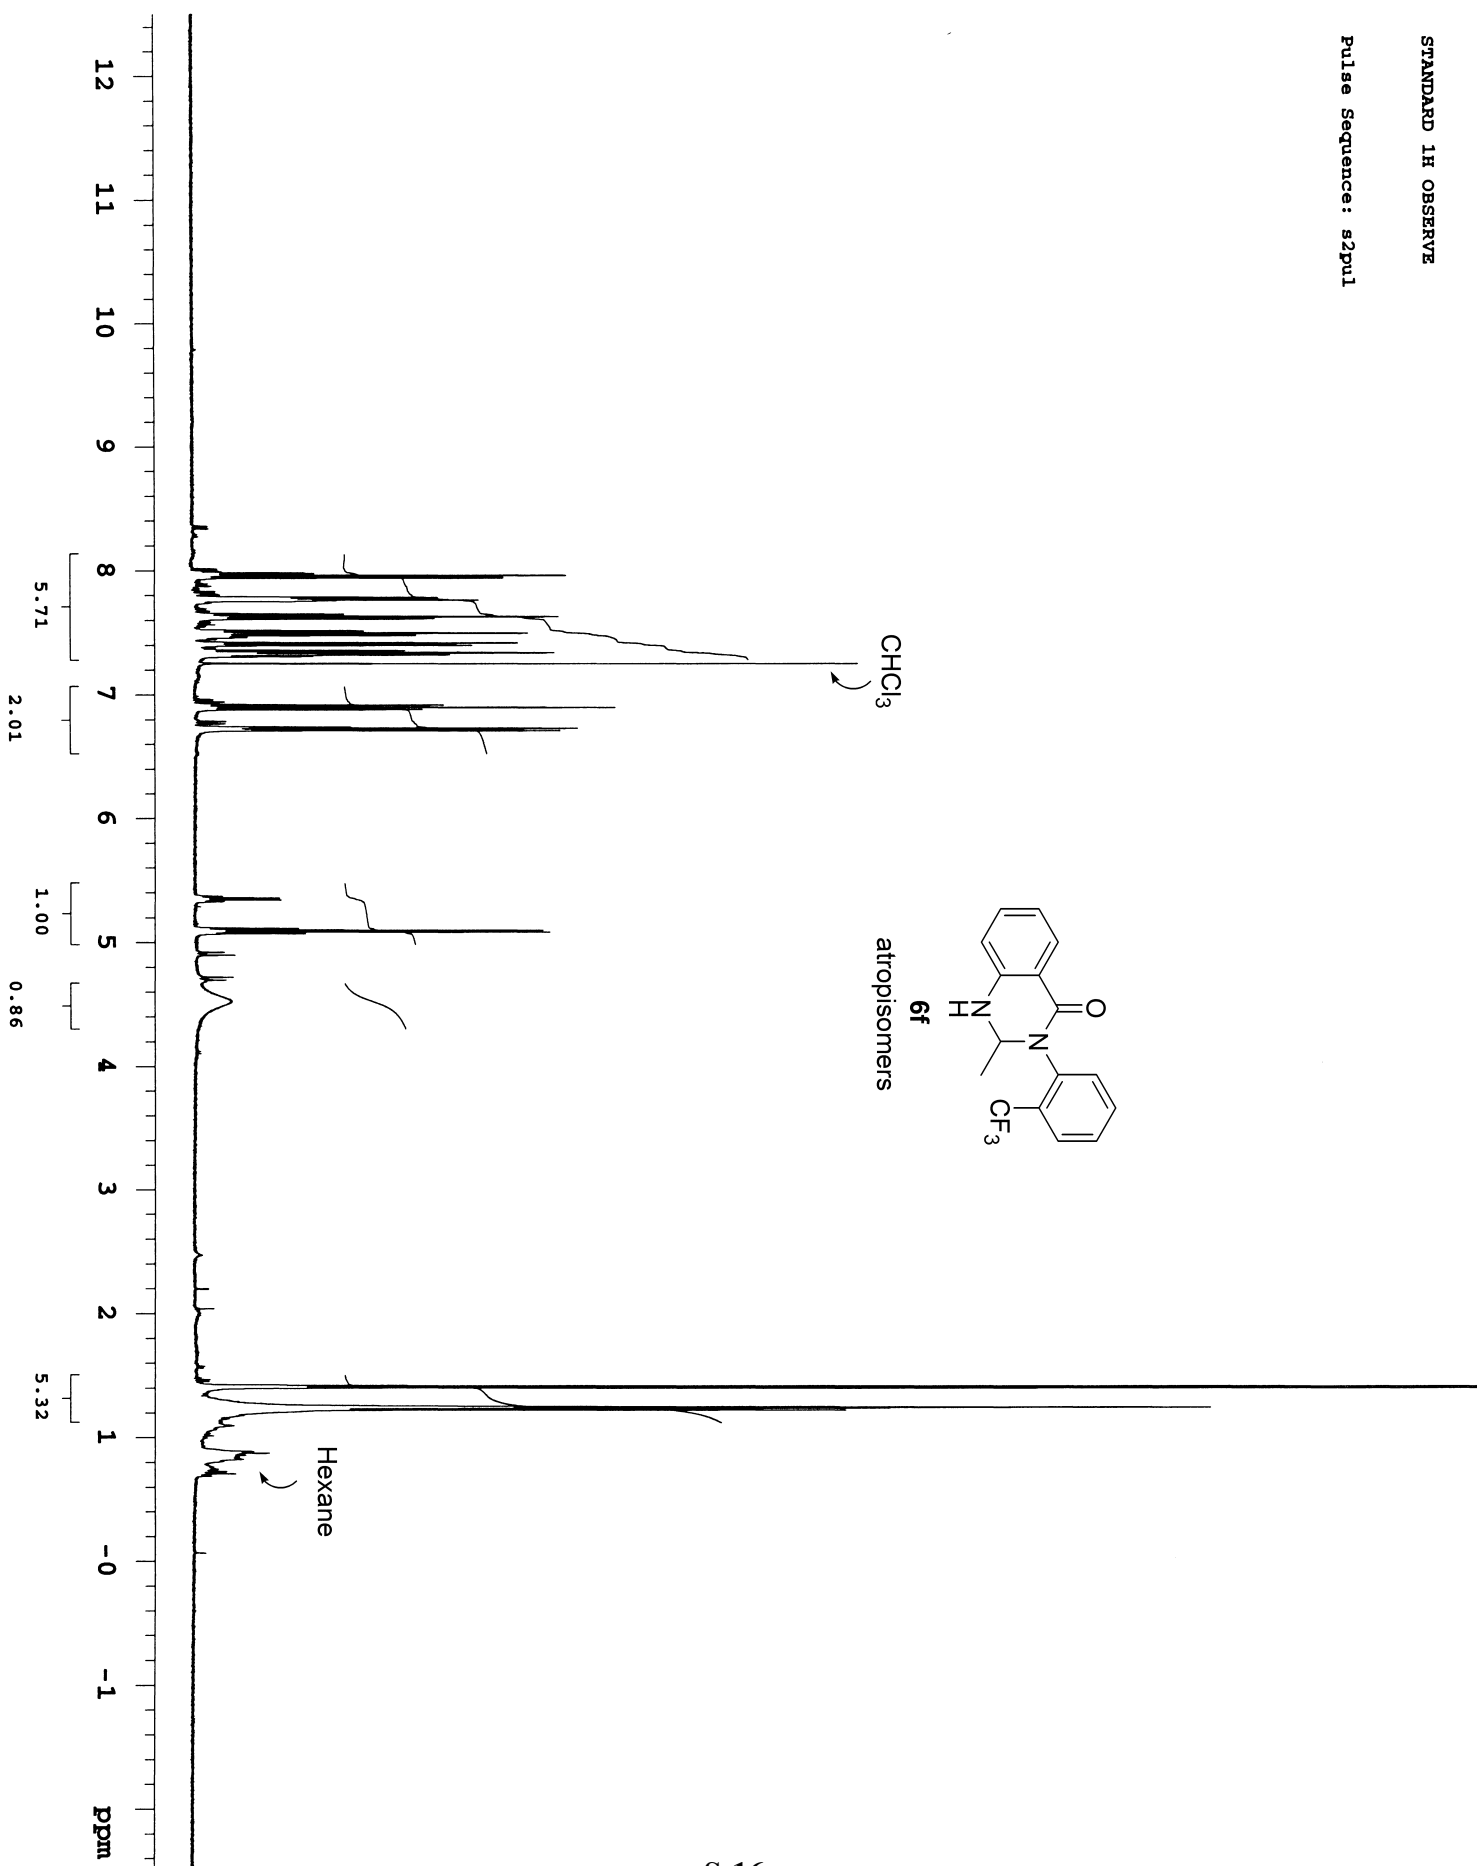



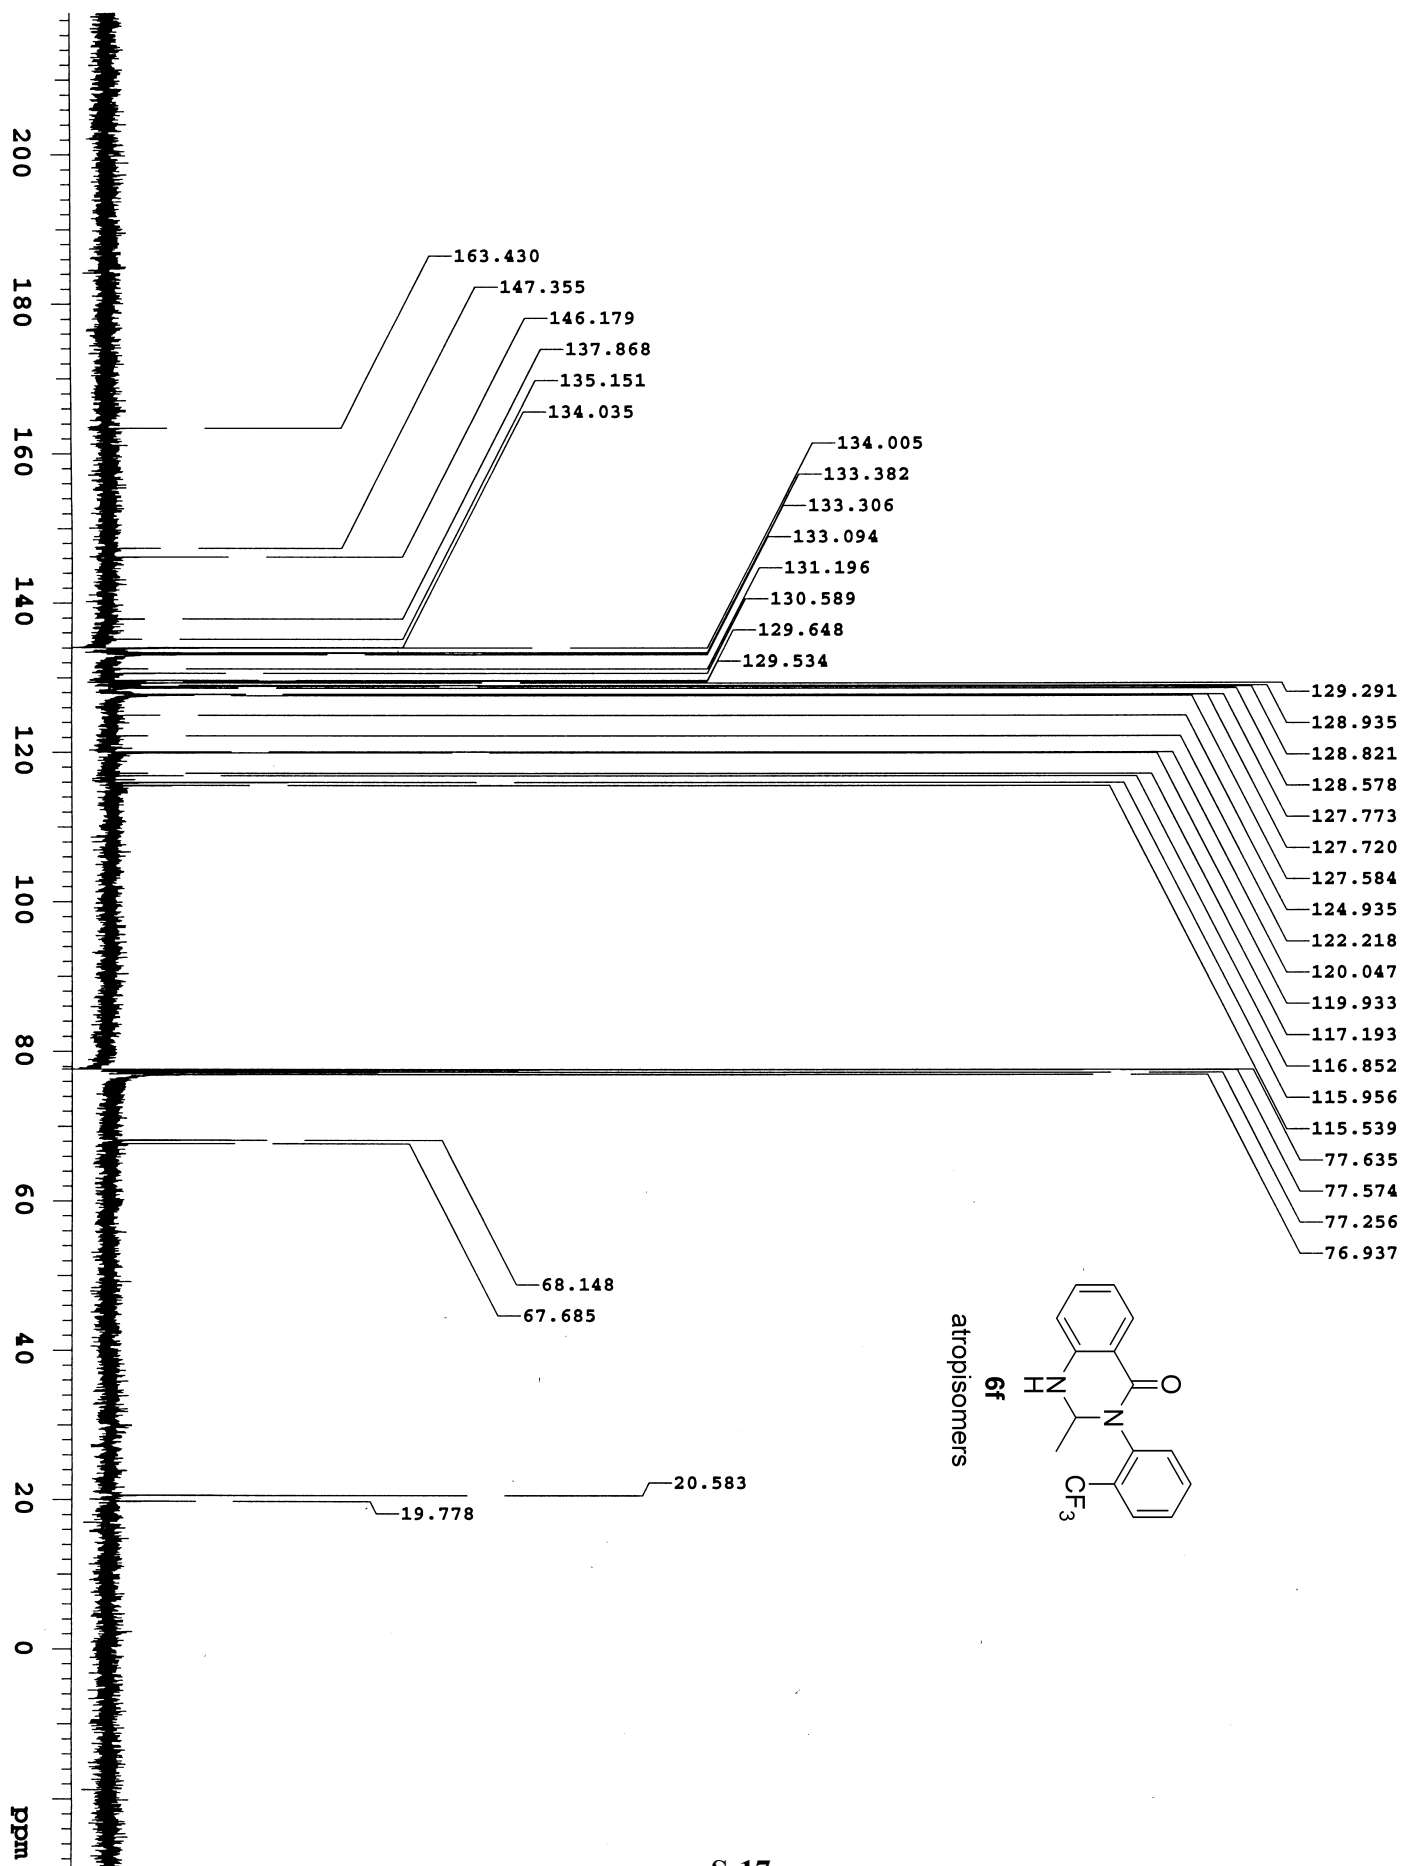

STANDARD 1H OBSERVE

Pulse Sequence: s2pul

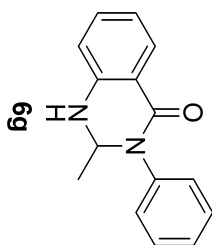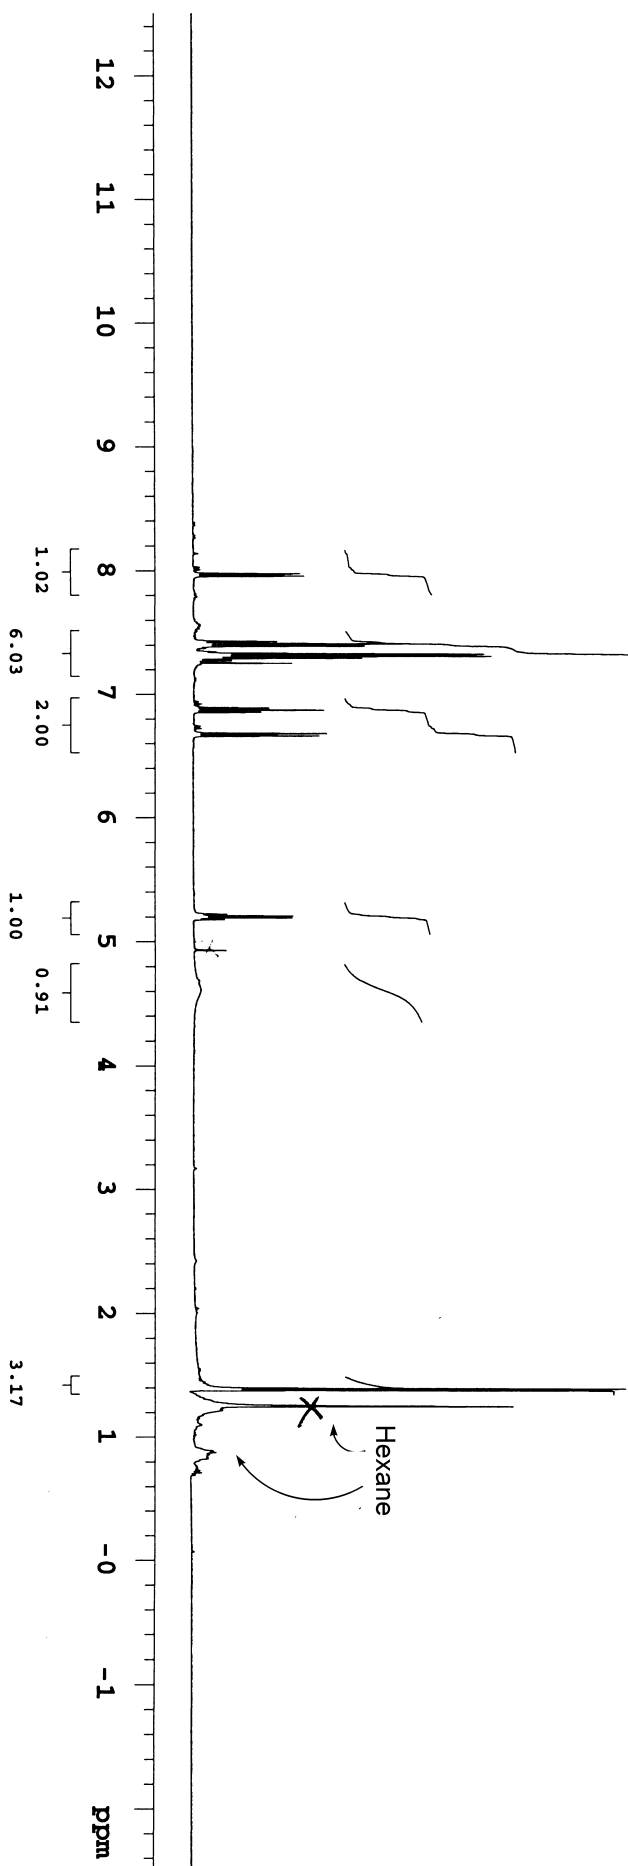

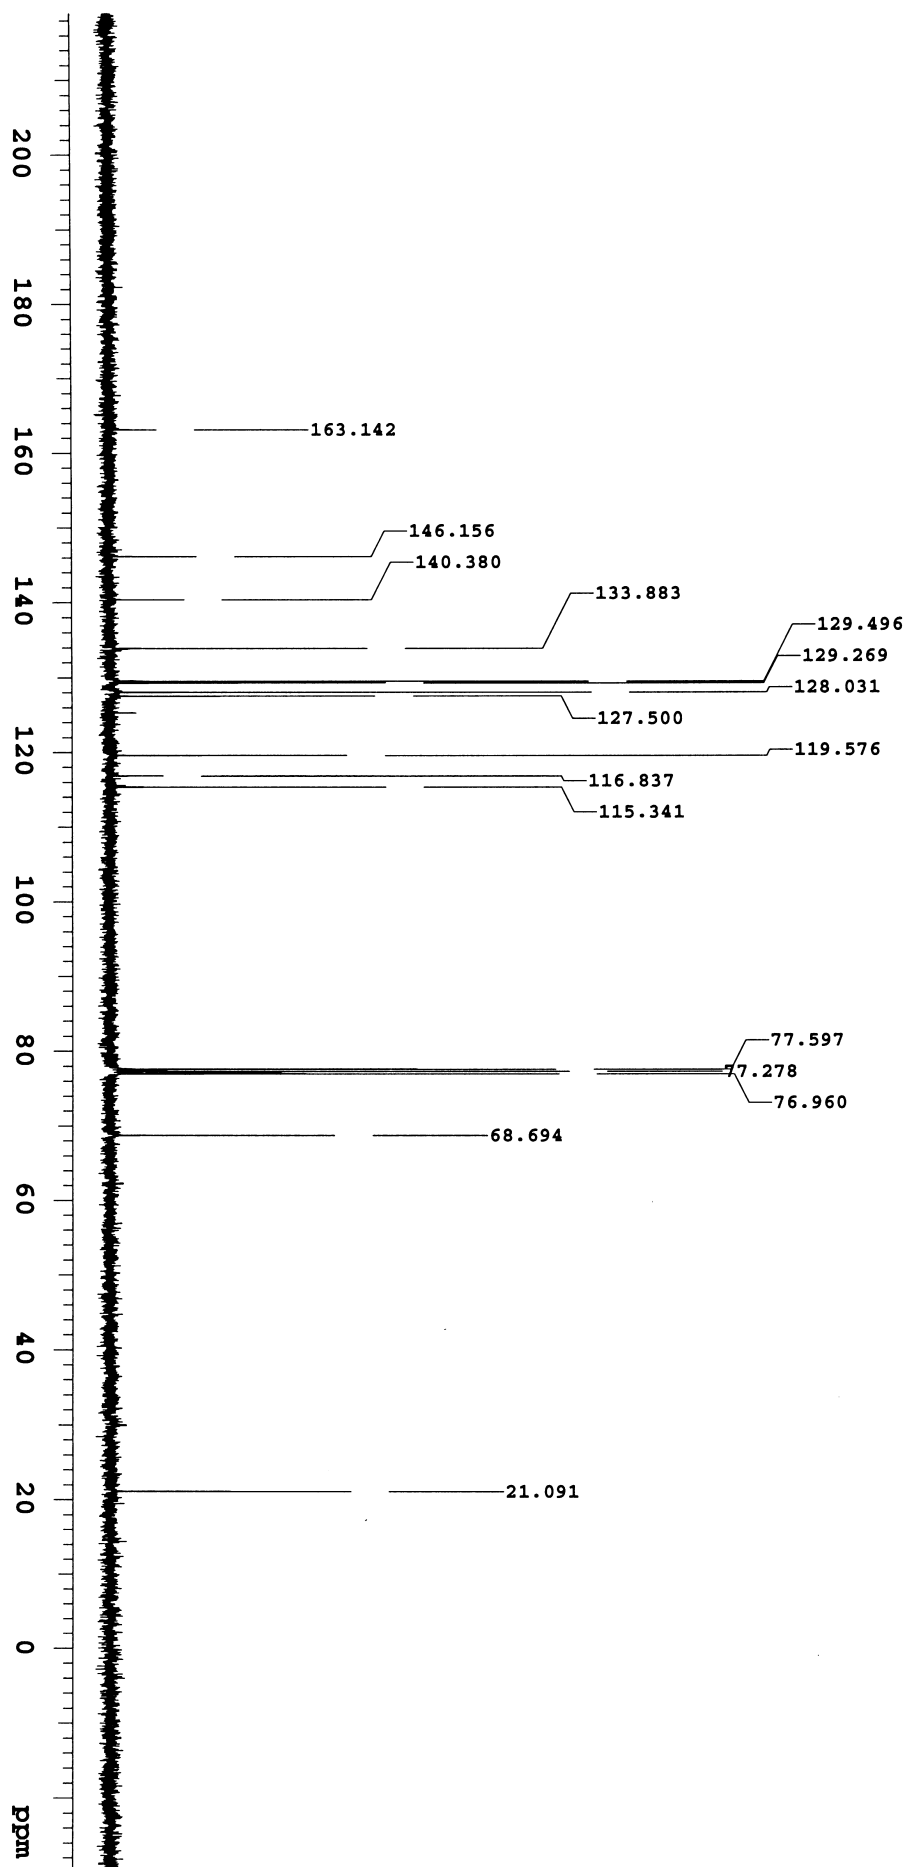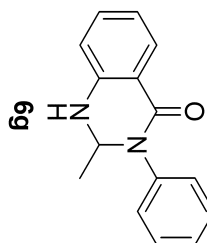

Supplement: Supplementary file 1 [file 5109625]
